# Supplementary material for: Negative regulation of miRNA sorting into EVs is mediated by the capacity of RBP PCBP2 to impair the SYNCRIP-dependent miRNA loading
Source: eLife. 2025 Jul 2;14:RP105017. doi: 10.7554/eLife.105017 (PMC12221297; doi:10.7554/eLife.105017)
Supplement: Supplementary file 1. [file elife-105017-supp1.xlsx]

## Sheet: all DEPs 
Significant	-LOG (P-value)	Difference mi155 MUT -WT	Protein names	Gene names	Peptides	Unique peptides	Sequence coverage [%]	Unique sequence coverage [%]	Mol. weight [kDa]	Score	Intensity	MS/MS count	LFQ intensity 1mir155MUT	LFQ intensity 1mir155WT	LFQ intensity 2mir155MUT	LFQ intensity 3mir155WT	LFQ intensity 4mir155MUT	LFQ intensity 4mir155WT
+	3.07539	-6.59577	60S ribosomal protein L32	Rpl32	6	6	41.5	41.5	15.86	28.839	560340000	155	20.2874	25.566	19.79	27.6264	19.1303	25.8027
+	3.96835	-6.25623	Calponin;Calponin-2	Cnn2	14	13	58.7	55.1	33.155	208.32	1870500000	248	19.6766	26.8261	19.8667	25.5203	19.7534	25.7189
+	2.16669	-5.5011	Hydroxymethylglutaryl-CoA synthase, cytoplasmic	Hmgcs1	20	18	52.3	44	57.552	323.31	4660600000	102	18.8804	26.7469	18.8796	23.5992	19.8759	23.793
+	2.60074	-4.96522	NEDD8-conjugating enzyme Ubc12	Ube2m	8	8	42.1	42.1	20.9	70.197	210620000	133	19.869	25.2318	19.2086	23.013	18.6574	24.3859
+	2.19534	-4.90656	Fructose-bisphosphate aldolase;Fructose-bisphosphate aldolase A	Aldoa	31	2	80.8	3.6	39.355	30.295	2938900000	36	20.1068	25.8555	18.6575	23.2279	19.1	23.5006
+	2.72429	-4.7205	Sorting nexin-3	Snx3	12	10	69.8	65.4	18.762	133.02	1156200000	86	20.8314	26.5733	20.1611	24.9897	21.0929	24.6839
+	2.3766	-4.38583	Zinc finger C2HC domain-containing protein 1A	Zc2hc1a	11	11	39.8	39.8	35.152	22.679	361900000	48	18.1019	23.3608	20.5218	24.1486	19.1247	23.3964
+	3.1918	-4.21733	Protein disulfide-isomerase	P4hb	19	19	45.9	45.9	56.6	323.31	1052800000	71	20.2406	24.8723	19.8679	24.5048	20.0763	23.4596
+	2.7127	-4.20661		Serpinb9b	14	13	39.5	37.1	42.733	140.19	1519900000	70	19.1239	24.6879	20.2747	23.9483	19.656	23.0382
+	2.24657	-4.10629	Nascent polypeptide-associated complex subunit alpha;Nascent polypeptide-associated complex subunit alpha, muscle-specific form	Naca	5	5	32.6	32.6	23.384	158.02	414350000	110	20.4399	23.3141	19.6843	25.4869	19.7101	23.3522
+	2.1428	-4.00289	Copine-1	Cpne1	13	12	31.9	30.2	58.886	323.31	533970000	83	20.1184	25.4311	20.1983	22.8211	19.5954	23.6686
+	2.01035	-3.99564	La-related protein 1	Larp1	21	21	27.2	27.2	121.15	315.3	391660000	68	18.4164	24.7428	20.2153	23.577	20.5967	22.8954
+	2.36859	-3.6063	Bifunctional lysine-specific demethylase and histidyl-hydroxylase MINA	Mina	10	10	25.6	25.6	53.516	35.021	653840000	18	18.7632	23.9407	19.539	22.4472	19.3332	22.0662
+	2.24306	-3.48084	Cell growth-regulating nucleolar protein	Lyar	9	9	20.6	20.6	43.735	28.759	424970000	24	20.7135	22.6044	18.6944	23.4774	19.6001	23.3687
+	2.0226	-3.37793	Replication factor C subunit 3	Rfc3	9	9	34.4	34.4	30.637	158.1	320100000	30	19.4892	23.7231	19.8892	21.6127	18.5785	22.7549
+	2.01271	-3.3268	Poly(rC)-binding protein 2	Pcbp2	17	5	58.4	18.3	38.15	323.31	14782000000	355	23.8676	28.8213	24.1497	26.5491	24.7957	27.4229
+	2.22497	-3.15906	Double-stranded RNA-binding protein Staufen homolog 1	Stau1	9	9	24.3	24.3	53.746	95.568	213880000	41	21.0396	22.6373	20.3697	24.3556	20.1807	24.0742
+	2.01902	-3.15318	Tumor susceptibility gene 101 protein	Tsg101	15	15	38.9	38.9	44.123	323.31	1536400000	59	20.5278	24.6589	21.1759	23.8276	19.9789	22.6556
+	1.91377	-3.11675	Zinc finger CCCH domain-containing protein 15	Zc3h15	8	8	24.9	24.9	48.327	269.04	670300000	28	20.308	23.9133	19.6821	23.263	19.4855	21.6495
+	2.55267	-2.77073	p21-activated protein kinase-interacting protein 1	Pak1ip1	10	10	29.7	29.7	41.058	265.22	609970000	20	19.7392	23.3894	20.0529	22.3167	19.668	22.0662
+	2.21593	-1.50669	T-complex protein 1 subunit delta	Cct4	34	34	69.8	69.8	58.066	323.31	15898000000	941	26.2303	28.1727	26.2186	27.905	27.0375	27.9287
+	1.82043	5.42281	Prohibitin-2	Phb2	9	9	31.4	31.4	33.296	24.432	60979000	82	25.2969	17.5784	25.9885	20.3693	22.6063	19.6755
	0.962093	-5.87184	40S ribosomal protein S21	mCG_6739;Rps21	5	5	60.5	60.5	8.88	255.29	432040000	573	17.6236	25.5328	18.5227	27.6034	26.4081	27.0337
	1.01976	-5.75889	40S ribosomal protein S15a	Rps15a	8	8	63.8	63.8	14.839	323.31	2501000000	420	18.7133	27.7142	27.1883	28.9365	20.4259	26.9535
	0.907305	-5.40745	60S ribosomal protein L22-like 1	Rpl22l1	3	3	25.4	25.4	14.467	55.267	2439700000	177	19.5413	28.0852	20.5557	29.4404	28.0313	26.8252
	1.28236	-5.36057	40S ribosomal protein S12	Rps12	8	8	70.5	70.5	14.515	239.71	3729600000	232	24.9105	28.4908	24.9554	29.3327	19.2924	27.4167
	1.42391	-4.87058	Prelamin-A/C;Lamin-A/C	Lmna	33	32	58.2	57	74.237	287.28	799590000	378	20.5537	25.5822	18.9753	27.111	24.0647	25.5123
	1.0818	-4.82206	Endothelial differentiation-related factor 1	Edf1	6	6	41.9	41.9	16.369	14.39	162300000	141	19.0961	25.104	19.2937	27.1465	25.2173	25.8228
	1.43516	-4.78735	SUMO-activating enzyme subunit 2	Uba2	36	36	63.9	63.9	70.568	323.31	4023100000	230	19.4798	27.0859	19.0626	22.201	19.1257	22.7433
	1.43883	-4.74623	DnaJ homolog subfamily A member 1	Dnaja1	18	18	57.7	57.7	44.868	323.31	6837700000	93	18.1297	26.9542	20.5075	23.0704	19.8522	22.7035
	0.822219	-4.73911	40S ribosomal protein S26	Rps26	5	5	50.4	50.4	13.015	18.535	1975500000	334	20.6199	27.785	28.5753	27.6046	20.6273	28.6502
	1.0794	-4.72684	DNA excision repair protein ERCC-6-like	Ercc6l	26	26	27.5	27.5	138.85	323.31	776520000	53	18.3034	27.1305	20.4828	22.7335	23.5361	26.6388
	0.992189	-4.67851	Myosin-9	Myh9	128	110	58.6	49.5	226.37	323.31	6755200000	6852	21.9162	27.381	23.1622	31.2796	28.0908	28.5441
	1.1685	-4.65418	60S ribosomal protein L24	Rpl24	7	7	36.9	36.9	18.252	71.956	894410000	220	19.7212	27.2562	25.4051	25.8884	20.1703	26.1146
	1.20006	-4.64148	Protein transport protein Sec61 subunit beta	Gm10320;Sec61b;Arl6ip3	2	2	18.6	18.6	11.788	4.9696	92444000	74	19.2499	21.4218	20.2408	26.2642	21.1755	26.9046
	0.821063	-4.50421	60S ribosomal protein L36	Rpl36	4	4	30.5	30.5	12.254	22.497	1370700000	301	20.2984	26.2931	27.3721	28.996	20.25	26.144
	0.64084	-4.43905	60S ribosomal protein L28	Rpl28	8	8	41.6	41.6	15.709	69.952	1146300000	420	19.785	25.1902	19.2451	27.0412	28.4207	28.5364
	1.16314	-4.3738	Myb-binding protein 1A	Mybbp1a	36	36	36.5	36.5	152.04	323.31	1056200000	353	19.2499	25.978	19.2875	25.1466	24.4973	25.0315
	1.0483	-4.36749	CTP synthase 1	Ctps1	22	20	45.7	41.3	66.682	323.31	2051800000	292	19.617	27.6701	19.5198	24.3504	24.5298	24.7486
	1.65657	-4.36415	Phosphatidylinositol-binding clathrin assembly protein	Picalm	15	1	35.5	5	71.543	267.45	680000000	97	19.1283	25.9706	19.9336	22.2877	18.8663	22.7624
	1.11365	-4.25095	Transforming protein RhoA	Rhoa;Rhoc	10	4	56	24.9	21.782	45.948	396890000	115	19.2626	26.0006	24.8282	25.2336	19.7518	25.3613
	1.52474	-4.21452	Testin	Tes	16	16	43.7	43.7	46.586	323.31	3442900000	90	18.7107	26.0208	21.7115	23.1717	19.5485	23.4218
	1.17355	-4.15237	14-3-3 protein eta	Ywhah	17	13	65	50.8	28.211	268.72	1028700000	184	18.9813	26.3763	20.4448	24.4912	24.253	25.2687
	0.720238	-4.1508	Protein deglycase DJ-1	Park7;Dj1	13	13	65.6	65.6	20.021	190.62	3418400000	468	19.7103	29.1617	19.4613	21.4312	20.0932	21.1243
	1.36948	-4.12512	DnaJ homolog subfamily A member 2	Dnaja2	18	18	56.1	56.1	45.745	323.31	4059500000	129	20.0945	26.4088	19.8807	25.0668	23.932	24.8071
	1.08648	-4.10943	Transcription elongation factor B polypeptide 2	Tceb2	10	10	66.9	66.9	13.17	41.546	709920000	48	18.7505	26.2436	20.6417	24.2413	24.4475	25.683
	0.994355	-4.05029	Plasminogen activator inhibitor 1 RNA-binding protein	Serbp1	27	27	56	56	44.714	323.31	3456500000	441	19.775	25.218	22.2426	26.3972	25.6465	28.1999
	0.989077	-4.02225	Serine/threonine-protein phosphatase 2A 65 kDa regulatory subunit A alpha isoform	Ppp2r1a	28	22	57	45.5	65.322	323.31	7934000000	387	21.2529	29.678	22.255	23.6328	22.3378	24.6017
	1.35486	-3.9801	Thioredoxin reductase 1, cytoplasmic	Txnrd1	19	19	35.6	35.6	67.083	323.31	9078100000	193	19.9517	27.5901	21.9551	23.9189	22.8234	25.1615
	1.08457	-3.96972	Serpin H1	Serpinh1	22	22	57.8	57.8	46.529	323.31	15893000000	269	22.7349	28.3335	23.4395	25.7568	19.8063	23.7997
	0.736443	-3.95224	GMP synthase [glutamine-hydrolyzing]	Gmps	40	40	74.5	74.5	76.723	323.31	3362800000	301	22.3499	28.353	19.2315	21.325	18.6876	22.4476
	1.13929	-3.89186	Uridine 5-monophosphate synthase;Orotate phosphoribosyltransferase;Orotidine 5-phosphate decarboxylase	Umps	30	30	72.1	72.1	52.292	323.31	7990700000	137	20.4947	27.4104	20.1709	22.3469	20.3149	22.8988
	1.2095	-3.86226	Septin-7	2024-09-07	8	7	23.9	21.8	48.754	60.787	393170000	107	18.3641	22.4069	19.3541	25.8674	20.1082	21.1389
	1.29015	-3.8509	Eukaryotic translation initiation factor 4H	Eif4h;mKIAA0038	7	7	36	36	25.186	323.31	723270000	94	19.2637	25.6708	23.6402	24.3736	20.1252	24.5374
	1.04463	-3.84252	Ran GTPase-activating protein 1	Rangap1	34	34	52.8	52.8	63.516	323.31	4202100000	379	19.7572	27.8673	21.4612	23.6467	23.9213	25.1533
	0.992176	-3.8297	Adenylosuccinate lyase	Adsl	24	24	61.4	61.4	54.865	323.31	5478400000	137	21.2065	26.7708	19.507	25.155	25.3836	25.6604
	0.627293	-3.80743	40S ribosomal protein S20	Rps20	5	5	31.1	31.1	13.373	70.302	3666300000	533	19.9208	28.7376	27.6553	30.2976	28.0614	28.0247
	0.619587	-3.78694	60S ribosomal protein L17	Rpl17	8	8	42.9	42.9	21.397	101.61	1403400000	469	18.8576	27.4192	27.397	28.9208	26.5005	27.7759
	1.3384	-3.77983	Ezrin	Ezr	38	26	60.8	45.2	69.406	323.31	1321500000	884	24.655	26.8649	23.3617	29.1099	22.0164	25.3978
	0.63185	-3.77724	KH domain-containing, RNA-binding, signal transduction-associated protein 1	Khdrbs1	11	10	22.6	20.5	48.37	323.31	3040300000	579	18.9722	25.721	27.4992	29.2828	24.2547	27.054
	0.556191	-3.72773	40S ribosomal protein S18	Rps18;Gm10260	14	14	58.6	58.6	17.718	191.41	6697200000	1059	20.0103	28.8868	28.8308	30.8173	28.591	28.9113
	0.997271	-3.72045	Biliverdin reductase A	Blvra	17	17	57.3	57.3	33.524	286.03	1891700000	209	18.8751	27.1314	21.0439	22.1434	20.608	22.4134
	0.948491	-3.68654	Activator of 90 kDa heat shock protein ATPase homolog 1	Ahsa1	16	16	55.9	55.9	38.145	323.31	4275000000	100	18.451	26.5358	20.7754	22.7857	23.5032	24.4679
	1.81769	-3.6587	Acidic leucine-rich nuclear phosphoprotein 32 family member A	Anp32a	9	7	31.8	27.8	22.954	94.889	449600000	99	20.5707	24.9783	20.2881	22.2345	20.2171	24.8391
	1.44534	-3.64234	Peptidyl-prolyl cis-trans isomerase NIMA-interacting 4	Pin4	5	5	49.6	49.6	13.815	47.531	170820000	6	18.7971	23.811	20.6998	24.9763	19.8238	21.4604
	0.632866	-3.63423	Ribosomal protein;60S ribosomal protein L10a	Rpl10a	12	12	44.7	44.7	24.831	181.16	2321800000	326	19.7836	28.6908	27.8912	28.8142	27.0952	28.1676
	1.07373	-3.61459	Eukaryotic peptide chain release factor subunit 1	Etf1	17	17	43.2	43.2	49.029	323.31	3532700000	115	20.2088	26.5687	20.7086	23.8183	19.791	21.1651
	1.45872	-3.56473	Ribosomal protein S6 kinase alpha-4	Rps6ka4	24	24	35.3	35.3	85.651	203.74	899480000	62	18.7449	25.0461	19.3456	21.6539	19.8252	21.9098
	0.658497	-3.54958	Destrin	Dstn	14	13	73.9	69.7	18.521	323.31	6307700000	283	24.4241	29.5551	23.9381	24.6846	19.1439	23.9151
	1.06756	-3.51435	Talin-1	Tln1	88	81	53.5	50.3	272.13	323.31	4058200000	457	21.5231	28.0284	20.6984	23.6346	22.9744	24.0759
	0.526447	-3.4867	40S ribosomal protein S9	Rps9	16	16	46.9	46.9	22.591	40.326	1849100000	523	19.3332	27.517	28.3833	29.9799	26.8513	27.531
	0.470867	-3.48603	60S ribosomal protein L18	Rpl18	8	8	41.5	41.5	21.643	129.29	1068300000	454	18.4034	25.0704	26.7655	30.0402	27.2286	27.745
	0.550958	-3.48591	60S ribosomal protein L23a	Rpl23a	11	11	52.3	52.3	17.564	52.853	1392500000	755	19.0393	26.5239	27.7416	29.1506	26.3274	27.8915
	1.25859	-3.45936	Mitotic checkpoint protein BUB3	Bub3	10	10	36.7	36.7	36.766	132.88	1338100000	84	22.4662	25.9531	22.0736	23.4815	19.068	24.5512
	0.726217	-3.4386	Moesin	Msn	32	20	51.5	37.3	67.766	120.13	471670000	397	19.7047	22.0823	22.4518	28.6167	21.4669	23.2401
	0.451889	-3.42511	40S ribosomal protein S3a	Rps3a1;Rps3a	19	19	65.5	65.5	29.885	323.31	4389400000	1421	18.8829	27.4025	28.5834	29.5474	28.3611	29.1529
	1.05439	-3.42188	Actin-related protein 3	Actr3	25	25	68.7	68.7	47.357	323.31	13087000000	231	23.0902	28.0941	21.4911	23.3253	21.2982	24.7257
	0.845316	-3.41966	CAD protein;Glutamine-dependent carbamoyl-phosphate synthase;Aspartate carbamoyltransferase;Dihydroorotase	Cad	50	48	32.8	31.5	236.25	323.31	1034300000	401	19.9068	25.2535	19.7749	24.3803	25.3589	25.6658
	0.918285	-3.41564	AP-2 complex subunit mu	Ap2m1	18	18	46.2	46.2	49.389	141.23	1202200000	83	17.8878	24.6669	19.8082	22.7465	23.4884	24.0178
	1.32149	-3.39338	Vasodilator-stimulated phosphoprotein	Vasp	15	15	45.9	45.9	39.666	311.41	1662200000	62	19.5328	25.1029	21.8925	23.027	18.9789	22.4546
	0.505473	-3.37715	60S ribosomal protein L8	Rpl8	12	12	44.4	44.4	28.066	303.56	2731800000	886	19.5329	27.043	28.7592	29.5848	26.9749	28.7705
	0.772302	-3.36687	EH domain-containing protein 1	Ehd1	31	19	72.3	48.1	60.602	323.31	5290000000	394	19.3371	28.315	24.3273	24.5862	23.9748	24.8386
	0.524653	-3.3578	40S ribosomal protein S7	Rps7;Gm9493	12	12	49.5	49.5	22.127	143.83	1571900000	478	19.5168	27.2385	27.8407	29.5439	27.5925	28.2412
	0.996826	-3.3176	Calcium/calmodulin-dependent protein kinase type II subunit delta	Camk2d	17	13	42	32.4	57.748	229.49	3517700000	96	18.8878	26.2475	22.7048	22.7399	22.1162	24.6743
	0.706461	-3.30633	Arginine--tRNA ligase, cytoplasmic	Rars	42	42	65.5	65.5	75.673	323.31	2155500000	431	18.7712	27.7954	24.8059	24.7297	23.0069	23.9778
	0.766856	-3.30267	Galactokinase	Galk1	20	20	62	62	42.309	323.31	4830900000	194	22.1975	27.7309	22.6862	23.3907	18.9325	22.6027
	0.494165	-3.28849	60S ribosomal protein L35a	Rpl35a	9	9	54.5	54.5	12.563	16.4	2772100000	466	19.9198	27.6732	28.1057	29.335	28.7302	29.613
	0.463489	-3.26589	60S ribosomal protein L31	Rpl31	8	8	56	56	14.411	51.48	2985600000	347	19.94	27.6197	29.0421	30.3523	28.4499	29.2577
	1.41747	-3.22614	Mitochondrial import receptor subunit TOM34	Tomm34	16	16	49.8	49.8	34.278	297.7	569030000	93	19.5089	24.5513	20.539	23.9938	23.0364	24.2176
	0.386669	-3.22346	40S ribosomal protein S11	Rps11	16	16	62.7	62.7	18.431	176.57	4961500000	910	19.2055	28.159	29.8747	30.3168	29.2313	29.5061
	1.75832	-3.17954	Cytoplasmic dynein 1 light intermediate chain 2	Dync1li2	15	14	47.8	45.1	54.218	273.83	1094300000	34	19.3116	24.5571	20.1614	22.5983	21.2642	23.1204
	0.534409	-3.16034	60S ribosomal protein L3	Rpl3	19	19	43.9	43.9	46.079	323.31	6731500000	586	19.032	27.1887	26.7842	28.1255	26.7205	26.7036
	0.932863	-3.1411	F-actin-capping protein subunit beta	Capzb	14	14	51.5	51.5	30.628	240.42	834140000	153	19.7124	26.2476	20.7192	21.0815	19.9363	22.4622
	0.879961	-3.1204	ATP-binding cassette sub-family F member 2	Abcf2	22	22	37.3	37.3	71.781	171.2	606650000	227	19.1535	25.5158	24.2449	26.0212	23.7791	25.0017
	1.09577	-3.11062	Dihydropyrimidinase-related protein 3	Dpysl3	24	19	68.7	58.5	61.779	323.31	557410000	83	19.235	25.5544	21.4095	21.5316	20.1026	22.9931
	1.28547	-3.10387	60S ribosomal protein L4	Rpl4	26	26	54.2	54.2	47.153	323.31	9996900000	1148	23.3811	27.3959	25.9381	29.6068	26.2746	27.9027
	1.26691	-3.09604	Guanine nucleotide-binding protein subunit gamma;Guanine nucleotide-binding protein G(I)/G(S)/G(O) subunit gamma-5	Gng5	3	3	38.2	38.2	7.3184	6.8563	32007000	118	22.2406	22.6634	21.386	24.5609	20.5793	26.2696
	0.72933	-3.07565	Asparagine--tRNA ligase, cytoplasmic	Nars	27	27	47.2	47.2	64.279	323.31	3853500000	333	21.1787	28.694	22.7126	23.0807	21.6957	23.0391
	0.642248	-3.06833	40S ribosomal protein S6	Rps6	9	9	35.7	35.7	28.68	202.02	1523100000	383	20.2081	26.2286	26.4977	28.5958	26.1757	27.2621
	0.790309	-3.05809	Eukaryotic translation initiation factor 2 subunit 3, X-linked;Eukaryotic translation initiation factor 2 subunit 3, Y-linked	Eif2s3x;Eif2s3y	25	25	59.3	59.3	51.105	323.31	11408000000	308	20.5013	27.9221	25.5547	26.3711	25.7805	26.7175
	0.435144	-3.04117	40S ribosomal protein S13	Rps13	12	12	61.6	61.6	17.222	130.49	3154800000	652	20.0133	28.1867	29.2776	30.1472	28.1982	28.2787
	0.938052	-3.02751	Thioredoxin-like protein 1	Txnl1	16	16	66.8	66.8	32.179	323.31	4037000000	321	22.7864	27.7418	20.5764	23.7999	23.5089	24.4127
	0.579232	-3.02205	Eukaryotic translation initiation factor 2A;Eukaryotic translation initiation factor 2A, N-terminally processed	Eif2a	16	16	38.4	38.4	64.403	171.53	427500000	238	17.794	24.0587	24.302	26.4532	24.5948	25.245
	0.521461	-3.013	40S ribosomal protein S2	Rps2;Gm5786;Gm18025;Gm6576;Gm10653	17	17	56.3	56.3	31.231	256.49	3672600000	598	20.6826	28.1929	28.4887	29.1475	27.9899	28.8598
	0.608874	-3		Qars	43	43	55.5	55.5	87.676	323.31	3329700000	380	18.535	27.0376	24.9821	25.2336	24.7717	25.0176
	1.26882	-2.98693	Eukaryotic translation initiation factor 4 gamma 2	Eif4g2	24	24	33.6	33.6	102.13	321.79	823540000	74	19.794	24.814	20.2619	23.704	23.1035	23.6023
	1.40084	-2.96909	Signal recognition particle subunit SRP72	Srp72	19	19	38.3	38.3	74.656	323.31	260960000	129	19.3772	24.5921	20.9763	23.8084	22.596	23.4563
	1.20761	-2.94308	Eukaryotic translation initiation factor 4 gamma 1	Eif4g1	62	1	41.4	0.5	175.33	323.31	5266000000	985	22.1547	28.1776	25.2777	26.7273	25.1082	26.4649
	0.572588	-2.92546	Heterogeneous nuclear ribonucleoprotein L	Hnrnpl	17	17	40.9	40.9	64.075	323.31	1584500000	266	18.5248	26.9767	23.7852	24.7201	25.7908	25.1804
	0.413449	-2.91833	60S ribosomal protein L13	Rpl13	11	11	49.3	49.3	24.305	184.49	2319800000	585	19.4706	27.1832	27.0546	28.8296	29.2348	28.5022
	0.468307	-2.8957	60S ribosomal protein L34	Rpl34	6	6	29.9	29.9	13.293	21.972	1319600000	405	19.5985	27.0487	27.3627	28.4521	27.6968	27.8442
	0.639513	-2.89527	Platelet-activating factor acetylhydrolase IB subunit alpha	Pafah1b1	20	20	59.3	59.3	46.67	323.31	6995400000	73	19.1187	27.0219	21.5906	21.0344	20.2261	21.5649
	1.12625	-2.87117	tRNA-splicing ligase RtcB homolog	Rtcb	26	26	58.4	58.4	55.249	323.31	10452000000	210	23.8687	27.7592	22.8894	26.2001	22.4732	23.8856
	1.12547	-2.86383	60S ribosomal protein L5	Rpl5	14	14	41.4	41.4	34.4	279.53	3120700000	813	22.7215	27.1333	26.168	28.7888	25.4869	27.0457
	0.435425	-2.85727	40S ribosomal protein S27	Rps27	5	3	41.5	15.9	9.2327	41.213	1377400000	280	19.608	26.233	27.6818	28.7625	27.6855	28.5515
	0.489596	-2.84946	60S ribosomal protein L10;60S ribosomal protein L10-like	Rpl10;Rpl10l	11	11	49.3	49.3	23.072	140.3	1429900000	431	19.5673	27.5313	27.0205	27.6251	27.3043	27.2841
	0.452167	-2.83682	Protein transport protein Sec31A	Sec31a	39	38	41.1	40.6	133.57	323.31	2377100000	178	24.2264	27.3311	18.8819	21.0612	18.5562	21.7827
	0.494082	-2.83293	60S ribosomal protein L26	Rpl26	10	10	45.5	45.5	17.258	43.684	2193700000	879	20.6442	27.2798	28.4314	29.4344	27.2295	28.0897
	1.18872	-2.82623	Ribonucleoprotein PTB-binding 1	Raver1	19	19	47.7	47.7	79.381	323.31	503600000	89	18.6236	24.3289	21.9211	23.2608	21.4752	22.9088
	0.757986	-2.82472	N(G),N(G)-dimethylarginine dimethylaminohydrolase 1	Ddah1	16	15	57.2	54.4	31.381	225.77	1987100000	193	19.2265	26.7127	22.5841	23.1322	23.6828	24.1227
	1.049	-2.82138	26S proteasome non-ATPase regulatory subunit 13	Psmd13	24	24	69.1	69.1	42.809	323.31	4209600000	153	20.8752	26.6853	23.4449	23.7108	23.6187	26.0069
	1.01581	-2.80285	tRNA (cytosine(34)-C(5))-methyltransferase	Nsun2	35	35	58.7	58.7	85.451	323.31	1890100000	231	20.0453	26.2428	22.4897	23.6971	23.6443	24.648
	0.970229	-2.78244	Cytoplasmic dynein 1 light intermediate chain 1	Dync1li1	19	18	54.7	52.2	56.614	287.91	1496300000	93	20.768	25.7773	19.5647	22.4616	22.533	22.9741
	0.433297	-2.78173	Polyadenylate-binding protein;Polyadenylate-binding protein 1	Pabpc1	33	19	60.5	40.6	70.669	323.31	5439400000	1442	19.7351	27.6772	28.4043	28.8527	27.0816	27.0364
	0.822204	-2.7817	Condensin complex subunit 2	Ncaph	14	14	24.8	24.8	82.302	323.31	1150800000	76	18.4418	25.4845	21.6507	23.1439	22.6859	22.4951
	0.782491	-2.75219	COP9 signalosome complex subunit 1	Gps1	19	2	44.1	5.3	58.86	186.59	2406400000	107	19.8509	26.1764	19.935	21.5331	22.3867	22.7196
	0.965744	-2.74138	Translation initiation factor eIF-2B subunit epsilon	Eif2b5	17	17	32.6	32.6	80.085	86.538	483360000	56	19.0168	24.3801	20.5212	23.1338	23.3785	23.6268
	0.538365	-2.74004	S-formylglutathione hydrolase	Esd	13	13	74.5	74.5	28.553	323.31	4572300000	432	25.236	28.7451	24.7842	24.6027	19.7101	24.6027
	0.630414	-2.73892	26S protease regulatory subunit 8	Psmc5	26	26	66.3	66.3	45.626	323.31	3585500000	191	18.8487	26.1513	22.7217	22.8116	24.5369	25.3612
	0.634151	-2.7326	Asparagine synthetase [glutamine-hydrolyzing]	Asns	26	26	53.1	53.1	64.282	323.31	3477300000	466	20.2688	28.2494	23.0935	23.0147	22.9018	23.1978
	0.527216	-2.73027	40S ribosomal protein S8	Rps8	10	10	54.8	54.8	24.205	323.31	1199100000	579	20.1683	27.0853	27.6866	27.2439	25.9468	27.6634
	0.974072	-2.71002	Glucose-6-phosphate 1-dehydrogenase;Glucose-6-phosphate 1-dehydrogenase X	G6pdx	25	25	53.4	53.4	59.262	323.31	3642700000	119	21.182	26.5745	22.2047	22.2396	21.243	23.9457
	1.82819	-2.68683	Four and a half LIM domains protein 3	Fhl3	5	5	22.1	22.1	31.794	26.143	428050000	55	20.3597	24.6889	21.0991	23.1259	21.9844	23.6888
	0.356348	-2.68624	Galectin-1	Lgals1	8	8	67.4	67.4	14.866	323.31	12598000000	426	26.6745	30.5727	26.9721	25.9161	19.2212	24.4378
	0.898266	-2.68607	Aminoacyl tRNA synthase complex-interacting multifunctional protein 1;Endothelial monocyte-activating polypeptide 2	Aimp1	18	18	77.1	77.1	33.997	323.31	985510000	229	19.6257	25.5386	22.5877	24.1092	24.1713	24.7951
	0.403535	-2.67687	40S ribosomal protein S10	Rps10	10	10	50.3	50.3	18.916	263.48	2252700000	625	19.4449	28.2044	27.7764	27.0123	27.8435	27.8788
	0.961294	-2.66612	ATP-dependent RNA helicase DDX19A	Ddx19a;Ddx19b	22	22	48.7	48.7	53.932	297.96	2554900000	80	20.0652	26.0469	21.3642	22.4085	22.6006	23.573
	0.428706	-2.66138	40S ribosomal protein S5;40S ribosomal protein S5, N-terminally processed	Rps5	14	14	55.4	55.4	22.876	224.67	1862300000	716	20.0974	26.9949	28.0431	28.3091	27.7871	28.6078
	0.615144	-2.65588	Cytoplasmic dynein 1 intermediate chain 2	Dync1i2	21	19	57.8	52.5	68.393	323.31	697930000	350	18.5749	26.0698	22.8545	23.8544	24.6851	24.1579
	0.939126	-2.64829	LIM and SH3 domain protein 1	Lasp1	11	7	36.5	26.2	29.994	323.31	7962000000	355	21.8628	28.0342	25.6313	26.3313	25.064	26.1375
	0.615749	-2.63062	Ataxin-10	Atxn10	23	23	52.2	52.2	53.71	323.31	5429100000	70	19.7873	26.8904	20.2929	21.3115	21.7433	21.5134
	0.474731	-2.62478	60S ribosomal protein L13a	Rpl13a	7	7	30.5	30.5	23.464	194.21	696260000	307	19.5407	25.4138	27.1401	28.1202	24.7003	25.7215
	0.774115	-2.62055	Protein FAM98B	Fam98b	14	7	49.2	23.5	45.349	323.31	2233800000	103	24.088	25.5064	21.8134	25.0741	19.5697	22.7522
	0.852651	-2.6182	Eukaryotic translation initiation factor 2 subunit 2	Eif2s2	18	18	63.4	63.4	38.092	323.31	2328700000	166	20.294	25.9385	24.2403	25.2124	24.7344	25.9725
	0.827973	-2.61328	40S ribosomal protein S14	rps14;Rps14	10	10	43	43	16.301	323.31	5479800000	563	24.6122	29.581	28.4187	31.1051	28.2378	28.4225
	0.982685	-2.60537	Developmentally-regulated GTP-binding protein 1	Drg1	13	12	46.3	44.4	40.524	320.41	451730000	71	23.0755	23.253	19.6881	23.5244	19.1375	22.9397
	0.617864	-2.60409	Importin subunit alpha;Importin subunit alpha-1	Kpna2	24	24	58.4	58.4	57.927	323.31	7771600000	195	20.0963	27.9714	23.1322	23.426	23.7949	23.4383
	0.942237	-2.58407	Zyxin	Zyx	20	20	42.7	42.7	60.546	220.48	755630000	334	20.2134	26.2201	21.8661	22.8741	22.9391	23.6766
	0.600243	-2.58154	UDP-N-acetylhexosamine pyrophosphorylase-like protein 1	Uap1l1	24	23	48.4	47.1	56.872	323.31	3947900000	268	21.6728	27.4098	23.2264	22.298	19.7536	22.6897
	0.950314	-2.56793	Lymphocyte-specific helicase	Hells	12	12	17.5	17.5	95.125	57.343	462490000	49	20.2081	23.8184	18.8775	22.9858	23.0672	23.0523
	0.917704	-2.54842	Eukaryotic translation initiation factor 3 subunit I	Eif3i	18	18	74.8	74.8	36.46	323.31	1745400000	137	19.9948	25.9586	23.5768	23.8499	23.2398	24.6482
	0.681039	-2.52944	Cyclin-dependent kinase 1	Cdk1	19	17	68.1	61.7	33.832	323.31	2087300000	279	20.3409	27.6091	23.59	24.2555	24.0857	23.7404
	0.548336	-2.52705	Small nuclear ribonucleoprotein Sm D2	Snrpd2;Gm5449	8	8	61.9	61.9	13.527	323.31	908540000	160	25.86	26.1842	26.5524	27.0389	20.1736	26.944
	1.15931	-2.52245	Nucleophosmin	Npm1;Gm5611	13	13	51.4	51.4	32.588	323.31	4903700000	386	23.2953	27.2437	26.0656	28.3943	26.2992	27.5894
	0.88988	-2.51543	Splicing factor 1	Sf1	16	16	40.8	40.8	61.755	319.61	647190000	163	20.8836	25.1047	24.5586	23.6973	20.8096	24.9961
	1.20415	-2.51295	Structural maintenance of chromosomes protein;Structural maintenance of chromosomes protein 3	Smc3	18	18	16.7	16.7	141.44	87.797	220880000	65	19.7068	23.7247	19.8706	23.3088	22.5767	22.6595
	0.817481	-2.5119		Fubp3	17	17	49	49	61.447	130.4	465310000	87	20.2851	25.3489	20.3888	22.8117	23.9949	24.0439
	0.37083	-2.51189	Lysine--tRNA ligase	Kars	30	30	42.9	42.9	67.883	323.31	2981900000	445	19.7074	28.2521	19.6935	21.9336	25.6167	22.3676
	1.1608	-2.5099	La-related protein 4	Larp4	15	15	21.3	21.3	79.762	128.38	666970000	98	19.8839	24.6608	21.0349	23.6382	23.0229	23.1724
	0.403892	-2.48891	60S ribosomal protein L9	Rpl9	10	10	68.2	68.2	21.881	210.12	1078800000	322	19.2264	27.5467	27.1307	26.0473	26.7571	26.9869
	0.314411	-2.48819	60S ribosomal protein L12	Rpl12	9	9	69.1	69.1	17.804	323.31	3768200000	568	19.0643	28.2843	28.6411	27.636	28.8646	28.1143
	0.528388	-2.4839	DNA helicase;DNA replication licensing factor MCM5	Mcm5	34	34	58.2	58.2	82.348	323.31	2343000000	218	18.4483	26.4915	23.4712	22.4338	23.6269	24.0728
	0.703403	-2.46975	ATP-binding cassette sub-family E member 1	Abce1	25	25	51.3	51.3	64.505	323.31	3678700000	380	22.0961	28.2608	22.3364	23.9144	24.1775	23.844
	0.34237	-2.43377	60S ribosomal protein L7a	Rpl7a	19	19	45.5	45.5	30.024	184.46	2025100000	686	18.548	25.7477	27.1682	27.3438	27.3065	27.2325
	0.498125	-2.41256	Filamin-B	Flnb	82	72	44.9	40.9	277.82	323.31	1961900000	654	20.8929	26.8435	21.3032	22.2968	25.8151	26.1086
	0.710468	-2.41218	Isocitrate dehydrogenase [NADP];Isocitrate dehydrogenase [NADP] cytoplasmic	Idh1	25	24	66.9	64.7	46.674	323.31	16657000000	384	21.7032	28.281	24.9038	24.1451	24.1323	25.5496
	0.500327	-2.39553	40S ribosomal protein S17	Rps17	9	9	65.9	65.9	15.524	323.31	1416500000	270	19.5327	27.012	25.2069	25.246	25.9196	25.5877
	0.432672	-2.36967	Peptidyl-prolyl cis-trans isomerase D	Ppid	20	20	51.6	51.6	40.742	323.31	7016600000	288	23.4453	27.5915	18.7408	23.712	24.4289	22.4205
	0.969613	-2.34206	Septin-9	2024-09-09	12	12	24.6	24.6	63.772	130.21	151470000	53	20.097	23.8894	19.7522	23.638	22.9767	22.3246
	0.864006	-2.3267	Kinesin-like protein KIF11	Kif11	24	24	28.6	28.6	118.03	323.31	490720000	140	21.6805	25.4119	20.7045	21.2509	20.5504	23.2527
	0.800691	-2.28983	Peptidyl-prolyl cis-trans isomerase FKBP4;Peptidyl-prolyl cis-trans isomerase FKBP4, N-terminally processed;Peptidyl-prolyl cis-trans isomerase	Fkbp4	37	37	69.2	69.2	51.572	323.31	16159000000	364	22.4394	28.3593	24.3662	24.981	25.0692	25.4041
	0.365908	-2.28922	Peroxiredoxin-1	Prdx1	15	14	57.8	57.8	22.176	56.753	2197000000	593	26.8902	28.0032	28.411	26.8933	19.9822	27.2545
	0.859338	-2.28172	Cytosol aminopeptidase	Lap3	25	25	61.8	61.8	56.141	323.31	4042500000	105	21.7796	26.7632	22.5392	23.0196	21.8708	23.252
	0.428881	-2.2795	Dihydropyrimidinase-related protein 2	Dpysl2	26	21	67.1	55.9	62.277	323.31	2344500000	396	19.8372	27.6818	23.3347	21.6055	24.6065	25.3295
	0.440457	-2.26811	40S ribosomal protein S23	Rps23	6	6	48.3	48.3	15.835	27.557	1630900000	513	20.7471	26.7353	27.1541	27.6436	27.4435	27.7701
	0.583969	-2.25343	COP9 signalosome complex subunit 3	Cops3	14	14	53.4	53.4	47.832	323.31	2606500000	67	19.8791	26.048	20.3055	22.0057	23.4967	22.3879
	0.435605	-2.25265	Regulator of nonsense transcripts 1	Upf1	56	56	60.2	60.2	123.97	323.31	2385000000	344	26.0095	27.5333	19.7111	23.2422	22.9014	24.6044
	0.423195	-2.22417	60S ribosomal protein L37a	Rpl37a	4	4	57.3	57.3	8.9946	92.762	730360000	147	20.3084	26.1354	27.159	26.4472	26.4114	27.9686
	0.471042	-2.22355	Importin subunit beta-1	Kpnb1	41	41	53.9	53.9	97.112	323.31	28139000000	659	23.0178	30.01	24.1815	23.6931	24.1582	24.3251
	0.384253	-2.22027	ADP-ribosylation factor 1;ADP-ribosylation factor 3	Arf3;Arf1	12	2	64.1	15.5	20.601	323.31	2694800000	283	19.0813	28.0623	25.2099	23.7573	24.9119	24.0443
	0.314613	-2.21487	Exportin-2	Cse1l	51	51	54	54	110.45	323.31	10378000000	622	19.0564	29.1417	25.1427	21.8583	23.2862	23.1298
	0.98953	-2.19977	Eukaryotic translation initiation factor 5	Eif5	21	21	45.7	45.7	48.968	323.31	5726000000	142	22.3653	27.0034	23.5337	24.0396	22.6295	24.0849
	1.16726	-2.1991	Heat shock 70 kDa protein 14	Hspa14	18	18	41.7	41.7	54.65	235.92	1101800000	61	21.1114	24.6364	20.6261	23.757	23.0967	23.0381
	0.704522	-2.19795	Nuclear cap-binding protein subunit 1	Ncbp1	23	23	37	37	91.926	323.31	1177800000	69	19.3657	25.3431	20.9137	21.5314	22.0144	22.0131
	1.05866	-2.17769	RuvB-like 2	Ruvbl2	20	20	48.4	48.4	51.143	216.86	2159900000	94	20.8439	25.6459	22.7644	23.3546	23.0798	24.2206
	0.724382	-2.17092	C-1-tetrahydrofolate synthase, cytoplasmic;Methylenetetrahydrofolate dehydrogenase;Methenyltetrahydrofolate cyclohydrolase;Formyltetrahydrofolate synthetase;C-1-tetrahydrofolate synthase, cytoplasmic, N-terminally processed	Mthfd1	49	48	59.3	58.5	101.2	323.31	4605800000	658	23.1114	28.3843	23.3169	24.1726	24.5978	24.982
	0.612302	-2.16983	Hsp90 co-chaperone Cdc37;Hsp90 co-chaperone Cdc37, N-terminally processed	Cdc37	15	15	40.6	40.6	44.593	323.31	4186700000	121	21.6384	26.4973	21.7434	21.642	20.4426	22.1945
	0.756523	-2.16716	Methionine--tRNA ligase, cytoplasmic	Mars	39	39	52.4	52.4	102.37	323.31	2549000000	299	20.938	26.7503	24.0246	23.711	23.2876	24.2903
	0.609564	-2.15371	DNA helicase;DNA replication licensing factor MCM3	Mcm3	40	40	63.1	63.1	91.577	323.31	3141000000	208	22.0678	26.9574	20.7373	22.3857	23.0359	22.9591
	0.714751	-2.1447	Microtubule-associated protein 4	Map4	22	12	30.6	18.3	117.43	323.31	298240000	79	21.4508	23.7502	19.119	21.1789	22.3226	24.3973
	1.13889	-2.13612	DnaJ homolog subfamily C member 2;DnaJ homolog subfamily C member 2, N-terminally processed	Dnajc2	14	14	32.5	32.5	63.44	217.87	753980000	79	20.262	24.4755	22.4259	24.0757	23.0485	23.5935
	0.400831	-2.12556	Triosephosphate isomerase	Tpi1	10	10	44.8	44.8	32.191	323.31	520480000	335	19.6229	26.0905	24.9939	24.1931	26.4335	27.1434
	0.724837	-2.12211	AP complex subunit beta;AP-2 complex subunit beta	Ap2b1	32	19	42.2	27.9	105.72	323.31	1909600000	147	21.7936	26.8062	22.0587	22.3626	22.776	23.8258
	1.6036	-2.10987	Coatomer subunit delta	Arcn1	21	21	50.5	50.5	57.229	323.31	950800000	210	22.6051	26.1035	23.0713	24.7639	24.159	25.2976
	0.72059	-2.1078	Structural maintenance of chromosomes protein 4;Structural maintenance of chromosomes protein	Smc4	57	57	45.2	45.2	146.89	323.31	2566800000	464	25.3947	27.5984	22.1683	26.1018	24.1115	24.2977
	1.37517	-2.09719	Eukaryotic translation initiation factor 3 subunit E	Eif3e	24	24	61.3	61.3	52.22	323.31	8176000000	228	23.4778	27.4469	24.4237	25.3687	24.6766	26.0541
	1.79356	-2.06025	T-complex protein 1 subunit eta	Cct7	37	37	73.2	73.2	59.652	323.31	9912200000	983	25.1335	28.4734	26.5705	27.6264	26.3837	28.1687
	0.49756	-2.05739	26S proteasome non-ATPase regulatory subunit 2	Psmd2	42	2	56.3	1.5	100.14	323.31	7557200000	425	21.4588	28.1959	23.8292	23.0484	24.8691	25.085
	1.41843	-2.05222		Ahnak	262	262	78	78	604.25	323.31	38055000000	6797	28.925	30.7003	27.2993	30.9753	29.1675	29.8728
	0.456419	-2.05091	Bifunctional glutamate/proline--tRNA ligase;Glutamate--tRNA ligase;Proline--tRNA ligase	Eprs	88	88	62.8	62.8	170.08	323.31	9045400000	959	21.7982	29.1603	25.0602	24.3817	24.5925	24.0615
	0.861745	-2.03699	Signal recognition particle subunit SRP68	Srp68	22	22	34.9	34.9	70.573	323.31	255830000	161	20.1829	24.2647	22.9899	24.5157	23.8022	24.3056
	0.757823	-2.03007	Phenylalanine--tRNA ligase beta subunit	Farsb	25	25	44.9	44.9	65.565	323.31	1375900000	286	21.8198	27.1152	23.7315	24.2471	23.2842	23.5635
	0.820432	-2.02282	Phenylalanine--tRNA ligase alpha subunit	Farsa	20	20	45.4	45.4	57.47	323.31	2447000000	95	21.0371	26.0498	23.5633	24.2509	22.6916	23.0597
	0.902609	-2.01429	Vesicle-fusing ATPase	Nsf	29	29	41.9	41.9	82.613	179.33	784650000	108	20.6576	25.3014	23.2076	23.0467	22.9191	24.479
	0.788596	-2.00822	6-phosphogluconate dehydrogenase, decarboxylating	Pgd	31	31	67.5	67.5	53.261	323.31	41043000000	662	25.1566	29.6368	25.5878	26.3109	25.1639	25.9854
	0.646625	-2.00185	Peptidyl-prolyl cis-trans isomerase FKBP5;Peptidyl-prolyl cis-trans isomerase FKBP5, N-terminally processed	Fkbp5	22	22	45	45	50.966	115.98	1911000000	72	19.4833	25.3099	22.2749	23.0759	23.2167	22.5946
	1.59576	-1.99755	14-3-3 protein zeta/delta	Ywhaz	19	14	73.1	59.2	27.771	323.31	3058300000	362	24.6014	27.867	25.2062	27.3201	26.337	26.9503
	0.462935	-1.99427	Small nuclear ribonucleoprotein-associated protein;Small nuclear ribonucleoprotein-associated protein B;Small nuclear ribonucleoprotein-associated protein N	Snrpn;Snrpb	6	6	19.2	19.2	24.614	13.223	123640000	32	25.2096	22.8049	20.299	23.712	19.4015	24.376
	0.594553	-1.97774	Coatomer subunit beta	Copb1	32	32	48.5	48.5	107.06	323.31	1723400000	149	21.6871	26.2165	21.9644	21.1155	21.2652	23.518
	0.473296	-1.96099	Threonine--tRNA ligase, cytoplasmic	Tars	38	34	60	54.2	83.355	323.31	4652400000	276	23.9952	27.1013	23.7074	23.5565	20.0851	23.0128
	0.693203	-1.95976	26S protease regulatory subunit 6A	Psmc3	19	19	55	55	45.236	323.31	2424800000	90	20.359	25.7342	21.9942	22.2894	23.0227	23.2315
	0.534947	-1.95674	WD repeat-containing protein 1	Wdr1	29	29	65.3	65.3	66.406	323.31	4612100000	380	23.7414	28.5439	23.154	24.0296	23.2939	23.486
	0.763208	-1.94798	Adenosylhomocysteinase	Ahcy	28	2	66.2	6.5	47.688	323.31	43014000000	592	25.0254	29.7825	26.2435	26.3882	25.517	26.4592
	0.63439	-1.94524	26S protease regulatory subunit 4	Psmc1	22	22	56.6	56.6	49.184	323.31	6545100000	174	21.7372	27.2328	23.547	23.4359	24.6034	25.0547
	0.951324	-1.93353	Vimentin	Vim	28	23	61.8	54.3	53.687	323.31	2683900000	128	22.0335	26.0741	23.8452	23.8385	22.0894	23.8561
	1.03726	-1.93023	60S ribosomal protein L27	Rpl27	8	8	49.3	49.3	15.798	233.67	3952500000	657	24.9478	28.9342	27.7296	28.4532	26.7686	27.8493
	0.510151	-1.91345	26S proteasome non-ATPase regulatory subunit 5	Psmd5	19	19	54.2	54.2	55.971	323.31	4466500000	139	20.7355	26.8274	21.9913	22.0917	23.1226	22.6707
	0.840309	-1.91153	Proliferation-associated protein 2G4	Pa2g4	27	27	69.5	69.5	43.698	323.31	20587000000	652	23.5235	28.2803	26.1961	26.8223	26.4431	26.7946
	0.959999	-1.88811	ATP-dependent RNA helicase Dhx29	Dhx29	20	19	18.3	17.5	153.97	145.53	298750000	84	20.0519	24.2193	22.6613	23.6767	22.61	23.0915
	0.643337	-1.85332	Transgelin-2	Tagln2	14	14	71.4	71.4	22.395	323.31	5786700000	645	24.1942	29.6393	26.6697	26.2292	26.3186	26.874
	0.335339	-1.85014	Vacuolar protein sorting-associated protein 35	Vps35	35	35	52.9	52.9	91.712	323.31	4602600000	339	19.1673	27.2493	23.6784	21.4759	23.7807	23.4517
	0.47535	-1.84864	DNA helicase;DNA replication licensing factor MCM7	Mcm7	34	34	58	58	81.196	323.31	5201300000	299	21.1971	27.741	24.3274	23.4072	24.1816	24.1038
	0.465482	-1.83501	Fatty acid synthase;[Acyl-carrier-protein] S-acetyltransferase;[Acyl-carrier-protein] S-malonyltransferase;3-oxoacyl-[acyl-carrier-protein] synthase;3-oxoacyl-[acyl-carrier-protein] reductase;3-hydroxyacyl-[acyl-carrier-protein] dehydratase;Enoyl-[acyl-carrier-protein] reductase;Oleoyl-[acyl-carrier-protein] hydrolase	Fasn	102	102	55.1	55.1	272.43	323.31	10887000000	1431	26.6443	29.2954	22.9521	25.5293	27.1001	27.3767
	0.637513	-1.83125	Eukaryotic translation initiation factor 3 subunit L	Eif3l	29	29	54.6	54.6	66.612	323.31	1814800000	308	23.0656	27.5482	23.3192	24.5244	26.0504	25.8563
	0.531295	-1.80382	Eukaryotic translation initiation factor 3 subunit C	Eif3c	29	26	31.8	28.6	105.53	323.31	2139500000	371	21.9471	27.2201	23.3253	22.3638	23.6444	24.7444
	0.406408	-1.80049	Microtubule-associated protein 1B;MAP1B heavy chain;MAP1 light chain LC1	Map1b	24	24	16.2	16.2	270.3	323.31	380450000	70	21.1997	25.4225	19.1551	21.2913	24.1553	23.1977
	0.430691	-1.79168	AP-2 complex subunit alpha-2	Ap2a2	35	26	46.6	34.9	104	219.2	1256100000	120	20.4037	25.4876	20.6622	21.2292	24.3237	24.0478
	0.553888	-1.78245	Protein LSM14 homolog A	Lsm14a	6	3	11.7	7.1	50.545	32.715	362150000	120	20.1783	23.2452	24.1278	25.4846	23.7973	24.721
	0.622745	-1.76856	Structural maintenance of chromosomes protein 2;Structural maintenance of chromosomes protein	Smc2	53	53	48.1	48.1	134.24	323.31	3016000000	315	25.0749	27.8118	22.6544	25.0239	24.1228	24.3222
	0.489424	-1.76735	Cytoplasmic dynein 1 heavy chain 1	Dync1h1	78	78	21.5	21.5	532.04	323.31	1190600000	151	21.4952	26.2461	20.8232	22.2947	22.1532	21.2328
	1.54249	-1.75336	60S ribosomal protein L14	Rpl14;Rpl14-ps1	6	6	27.8	27.8	26.316	36.135	1861900000	501	25.7862	28.5649	27.5829	28.3066	26.6716	28.4293
	0.536933	-1.75318	Fascin	Fscn1	27	27	63.7	63.7	54.507	323.31	18393000000	432	22.8625	28.5507	24.8315	24.8673	25.6794	25.215
	0.392233	-1.74151	Histone H2A;Histone H2A.V;Histone H2A.Z	H2afv;H2afz	4	2	31.2	18.8	13.509	8.3003	786030000	376	20.6383	26.1574	26.9383	26.0042	25.0884	25.728
	0.736264	-1.73885	60S ribosomal protein L7	Rpl7	25	25	55.6	55.6	31.419	323.31	2004000000	767	23.6592	26.3628	26.4345	28.3361	26.3522	26.9636
	0.990188	-1.73334	Insulin-like growth factor 2 mRNA-binding protein 1	Igf2bp1	25	24	48.9	47.1	63.45	323.31	3086100000	452	24.0508	27.7524	26.2738	26.946	25.1558	25.9819
	0.662756	-1.72954	Glycylpeptide N-tetradecanoyltransferase;Glycylpeptide N-tetradecanoyltransferase 1	Nmt1	11	7	28.4	18.1	56.888	131.23	301890000	69	22.9893	24.2866	23.532	24.3314	19.9723	23.0643
	0.506631	-1.72872	Pre-mRNA-processing factor 19	Prpf19	13	13	37.5	37.5	55.238	80.214	1338700000	99	20.0719	24.8836	21.3424	22.1063	24.2991	23.9097
	0.202498	-1.72176	Ribonuclease inhibitor	Rnh1	21	21	66.7	66.7	49.843	323.31	10335000000	499	19.4006	28.2914	30.2266	24.8711	25.1223	26.7524
	0.431842	-1.71682	ATP-dependent RNA helicase DDX3X;Putative ATP-dependent RNA helicase Pl10	Ddx3x;D1Pas1	34	9	63.1	25.6	73.013	323.31	3115200000	954	21.8955	27.9784	26.6524	26.1063	26.7085	26.3222
	0.836167	-1.71018	Serpin B6	Serpinb6a;Serpinb6	22	21	66.1	63.8	42.598	323.31	22684000000	689	24.1237	28.3169	25.9698	25.9506	25.0171	25.9735
	0.607077	-1.70727	40S ribosomal protein S4;40S ribosomal protein S4, X isoform	Rps4x;Rps4l;Gm15013	20	20	66.5	66.5	27.504	323.31	2834400000	913	24.8355	27.6134	28.6765	29.5708	26.5672	28.0167
	2.07243	-1.69628	Poly(rC)-binding protein 1	Pcbp1	16	13	76.7	65.7	37.497	323.31	7145800000	415	25.6809	27.9093	25.3083	26.9986	26.08	27.2502
	0.527019	-1.69603	Filamin-A	Flna	84	75	45.2	41.8	280.47	323.31	2978000000	850	24.3675	27.8315	22.8497	24.3215	26.2494	26.4017
	0.530365	-1.67937	60S ribosomal protein L6	Rpl6;Gm5428	16	16	45.9	45.9	33.509	323.31	5644800000	942	24.2991	27.5662	27.6596	29.5763	28.4099	28.2642
	0.408711	-1.67654	Cytoplasmic FMR1-interacting protein 1	Cyfip1	42	25	39.2	24.4	145.24	323.31	1923100000	147	23.6723	27.0712	20.9216	22.0245	22.4399	22.9677
	1.06772	-1.67134	YTH domain-containing family protein 1	Ythdf1	17	10	33.4	20.5	63.899	323.31	276330000	75	21.5764	24.9107	21.6433	23.166	22.7962	22.9532
	0.506978	-1.66223	Stress-induced-phosphoprotein 1	Stip1	31	31	57.6	57.6	62.5	323.31	4033100000	577	23.9183	28.2743	24.1924	24.134	23.2758	23.965
	0.714589	-1.65657	YTH domain-containing family protein 3	Ythdf3	17	11	34.9	25	63.961	323.31	1852800000	561	26.6747	26.6663	23.1469	27.0311	25.7274	26.8213
	0.752935	-1.64541	Heterogeneous nuclear ribonucleoprotein H;Heterogeneous nuclear ribonucleoprotein H, N-terminally processed	Hnrnph1	16	8	49.7	27.6	49.199	323.31	9431900000	401	23.6484	27.6174	26.548	25.9963	24.5687	26.0876
	0.378551	-1.63493	Adenylosuccinate synthetase isozyme 2	Adss	22	20	57.9	53.3	50.02	323.31	13829000000	245	23.646	28.1003	22.2094	22.4054	23.0741	23.3286
	1.25164	-1.63298	Fructose-bisphosphate aldolase	Aldoa;Aldoart1	32	3	82.3	15.1	45.12	323.31	65899000000	1572	26.7925	30.0624	27.9859	28.7166	28.3539	29.2523
	1.15408	-1.61857	T-complex protein 1 subunit beta	Cct2	42	42	83.4	83.4	57.477	323.31	27763000000	997	25.8381	29.0587	26.3092	27.8728	27.2566	27.3282
	0.372066	-1.60999	Polyadenylate-binding protein	Pabpc4;Gm10110	26	17	41.6	28.1	67.852	155.51	697910000	84	21.0057	26.4633	22.4516	22.5996	21.2381	20.4623
	0.334344	-1.59693	Hyaluronan mediated motility receptor	Hmmr	14	14	29.3	29.3	96.67	256.11	307640000	76	19.6345	22.4215	20.2556	24.7312	25.448	22.9761
	0.375064	-1.59541	Aspartate--tRNA ligase, cytoplasmic	Dars	24	24	55.5	55.5	57.145	274.38	2115000000	240	19.9201	25.0696	25.045	24.8238	25.4429	25.3008
	0.356831	-1.59037	Eukaryotic translation initiation factor 3 subunit A	Eif3a	80	80	57.9	57.9	161.93	323.31	8157300000	600	24.3302	29.0872	22.8348	23.6211	25.9121	25.1399
	0.433134	-1.58666	Chloride intracellular channel protein;Chloride intracellular channel protein 1	Clic1	16	16	78	78	27.013	323.31	9765300000	331	26.5313	29.8964	26.155	25.441	24.1034	26.2123
	0.630338	-1.57666	Matrin-3	Matr3	21	21	34.3	34.3	94.629	323.31	448380000	144	20.3784	25.0354	23.2907	22.703	22.6594	23.32
	1.83963	-1.53594	T-complex protein 1 subunit zeta	Cct6a	29	29	70.2	70.2	58.076	323.31	8807800000	1351	26.6799	28.017	26.5772	28.4076	27.4455	28.8858
	0.376694	-1.52467	Coatomer subunit alpha;Coatomer subunit alpha;Xenin;Proxenin	Copa	56	56	55.6	55.6	138.52	323.31	2341700000	193	22.4443	27.442	22.1551	21.9887	23.5393	23.2821
	0.356713	-1.52228	78 kDa glucose-regulated protein	Hspa5	18	16	34.7	33	72.422	93.647	300740000	161	19.4283	24.8068	24.7199	24.3403	24.7536	24.3215
	0.321748	-1.51644	Kinesin-1 heavy chain;Kinesin-like protein	Kif5b	49	49	62.1	62.1	109.55	323.31	2015400000	360	23.759	27.3782	20.5816	22.2207	24.3645	23.6555
	0.631316	-1.5123	Alpha-enolase;Enolase	EG433182;Eno1	20	20	60.8	60.8	47.14	323.31	4994000000	169	25.2218	27.0885	24.6694	26.7862	23.526	24.0794
	0.293129	-1.49817	Peptidyl-prolyl cis-trans isomerase;Peptidyl-prolyl cis-trans isomerase B	Ppib	9	9	38.9	38.9	23.713	24.368	254560000	112	26.269	24.0665	24.0764	26.9768	20.0841	23.8806
	0.31177	-1.49645	S-methyl-5-thioadenosine phosphorylase	Mtap	21	21	73.1	73.1	31.062	323.31	4227200000	403	23.7283	28.7565	22.6541	22.4376	24.392	24.0696
	1.20781	-1.48763	Heterogeneous nuclear ribonucleoprotein K	Hnrnpk	24	1	59	7.8	51.006	323.31	13585000000	1714	25.7385	28.6597	27.4782	28.2679	27.2637	28.0157
	0.168942	-1.48405	60S ribosomal protein L38	Rpl38	7	7	52.9	52.9	8.2038	192.39	638360000	178	19.2223	28.0382	25.6233	21.1672	27.3845	27.4768
	1.60816	-1.4779	Calreticulin	Calr	3	3	9.2	9.2	42.195	118.23	79595000	14	19.6906	21.1054	20.2302	22.2937	20.4241	21.3795
	0.291115	-1.46783	STE20-like serine/threonine-protein kinase	Slk	54	2	54	1.5	141.46	323.31	4001600000	479	20.9005	27.9568	24.8264	22.5233	24.1168	23.7672
	0.290713	-1.45106	Heterogeneous nuclear ribonucleoprotein M	Hnrnpm	36	36	60	60	73.74	323.31	2261700000	397	23.6426	27.787	22.8405	21.494	21.3631	22.9184
	1.03462	-1.45051	T-complex protein 1 subunit alpha	Tcp1	36	36	73.9	73.9	60.448	323.31	9875500000	1502	25.879	28.6675	27.2209	28.2035	28.0794	28.66
	0.724174	-1.4345	Eukaryotic translation initiation factor 2 subunit 1	Eif2s1	29	29	74.6	74.6	36.108	323.31	6780100000	320	24.7139	28.0756	25.0649	25.6474	24.8067	25.166
	0.493915	-1.42841	Fragile X mental retardation syndrome-related protein 1	Fxr1	28	25	48.2	44.2	76.221	323.31	1227500000	247	22.2821	26.9218	25.24	25.1996	24.0398	23.7258
	0.379472	-1.42499	N-alpha-acetyltransferase 15, NatA auxiliary subunit	Naa15	41	36	43.6	40.1	101.09	323.31	4642500000	216	21.9306	27.3802	23.2222	23.5929	24.327	22.7817
	0.461085	-1.42398	Eukaryotic translation initiation factor 3 subunit D	Eif3d	20	20	53.3	53.3	63.988	323.31	1517000000	201	22.8469	27.3353	23.3246	23.7716	25.4926	24.8291
	0.467303	-1.42317	Hexokinase-2;Hexokinase	Hk2	26	23	36.3	33	102.53	323.31	991640000	115	20.0453	25.0953	22.9477	21.996	22.8515	23.0227
	0.546538	-1.40223	D-3-phosphoglycerate dehydrogenase	Phgdh	24	24	40.5	40.5	56.585	323.31	25431000000	670	25.1288	29.1386	25.9335	27.0168	28.2041	27.3177
	0.305994	-1.37937	Filamin-C	Flnc	97	86	49.9	45.6	291.12	323.31	6291700000	1039	25.512	28.621	22.6863	24.5322	27.5342	26.7174
	0.539799	-1.36875	ATP-dependent RNA helicase DDX1	Ddx1	52	52	68.4	68.4	82.499	323.31	8583600000	825	28.0256	28.2589	24.7727	27.5919	25.4321	26.4858
	0.42964	-1.36598	Copine-3	Cpne3	19	17	46.9	43.5	59.584	176.36	3398800000	145	21.5001	26.2752	22.5787	22.1557	23.4548	23.2006
	0.24188	-1.32155	Elongation factor Tu, mitochondrial	Tufm	13	13	33.6	33.6	49.508	70.007	346990000	113	19.0653	22.0193	25.3601	25.0867	23.8282	25.1123
	0.198563	-1.31825	Vigilin	Hdlbp	57	57	53.6	53.6	141.74	323.31	5093900000	405	26.128	28.3373	20.3651	22.5592	22.9479	22.4993
	0.377867	-1.3163	Multifunctional protein ADE2;Phosphoribosylaminoimidazole-succinocarboxamide synthase;Phosphoribosylaminoimidazole carboxylase	Paics	33	33	77.6	77.6	47.006	323.31	18971000000	453	24.143	28.5602	23.9483	24.2187	25.1813	24.4427
	1.02346	-1.295	Ubiquitin-60S ribosomal protein L40;Ubiquitin;60S ribosomal protein L40;Polyubiquitin-B;Ubiquitin;Polyubiquitin-C;Ubiquitin;Ubiquitin-related 1;Ubiquitin-related 2	Kxd1;Uba52;Ubc;Gm8797;Gm1821;Ubb;Gm5239	6	1	44.5	7.8	14.728	257.1	7578500000	1538	26.4036	28.2343	26.573	28.8708	27.3361	27.0925
	0.573215	-1.27516	40S ribosomal protein S16	Rps16	13	13	67.1	67.1	16.445	61.599	4364200000	904	26.298	29.0691	29.3927	30.0436	28.6862	29.0897
	1.00358	-1.27044	RuvB-like 1	Ruvbl1	15	15	42.8	42.8	50.213	201.66	1454600000	97	22.4036	24.9228	22.9614	24.0816	24.2318	24.4036
	0.489746	-1.25735	26S proteasome non-ATPase regulatory subunit 11	Psmd11	31	31	71.1	71.1	47.436	323.31	11255000000	338	24.1031	27.6251	24.0256	24.2351	25.6722	25.7128
	0.341109	-1.24896	Profilin;Profilin-1	Pfn1	12	6	91.4	50.7	14.957	323.31	25984000000	466	28.9066	31.5641	27.7967	26.9804	26.5402	28.4458
	0.262149	-1.23447	Isocitrate dehydrogenase [NAD] subunit, mitochondrial	Idh3b	6	6	18	18	42.194	21.73	160140000	43	18.9913	21.1462	23.9469	21.1563	20.2527	24.5918
	0.221408	-1.23386	Ras GTPase-activating-like protein IQGAP1	Iqgap1	54	51	40.7	39.2	188.74	323.31	1964700000	124	22.0229	27.1825	21.4404	19.9766	21.7516	21.7572
	0.51159	-1.22958	Elongation factor 2	Eef2	63	62	72.5	71.3	95.267	323.31	96043000000	4570	27.7139	31.7587	29.0917	28.7499	29.2121	29.1978
	1.30361	-1.21246	Autophagy protein 5	Atg5	8	8	34.9	34.9	32.402	67.419	340540000	13	20.6884	22.7429	20.6474	21.4708	20.6448	21.4043
	0.290957	-1.21155	Tubulin beta-6 chain	Tubb6	28	14	65.8	36.7	50.09	323.31	7669500000	165	22.391	27.3071	23.5948	21.9486	22.6025	22.9673
	0.467312	-1.18432	T-complex protein 1 subunit epsilon	Cct5	37	37	70.2	70.2	59.623	323.31	10100000000	800	25.8691	29.6482	26.1927	26.6346	27.6133	26.9453
	0.329623	-1.17264			20	1	25.3	2.1	115.26	241.06	464840000	214	20.2966	23.7483	24.9984	24.6423	24.0728	24.4952
	0.444564	-1.16834	Nuclease-sensitive element-binding protein 1	Ybx1	22	8	72.4	35.7	35.73	323.31	9698300000	297	27.4975	26.9068	23.8909	26.9503	24.8714	25.9077
	0.692781	-1.15256	Staphylococcal nuclease domain-containing protein 1	Snd1	44	44	56.9	56.9	102.09	323.31	2607000000	618	24.6226	27.6163	25.0968	25.9197	26.3602	26.0012
	0.87194	-1.14628	T-complex protein 1 subunit theta	Cct8;Cctq	37	37	72.8	72.8	59.555	323.31	13918000000	1554	26.3444	28.8449	27.726	28.4045	28.3738	28.6336
	0.296883	-1.11163	ATP-citrate synthase	Acly	53	53	53.3	53.3	120.79	323.31	5372500000	593	25.2135	28.7327	24.4914	24.3973	24.2292	24.1391
	0.429701	-1.11098	Glutathione S-transferase omega-1	Gsto1	19	19	72.1	72.1	27.497	323.31	6653900000	669	26.0495	28.9732	27.4852	26.8225	25.067	26.139
	0.161022	-1.10916	Eukaryotic translation initiation factor 3 subunit B	Eif3b	40	40	50.1	50.1	108.98	323.31	4259800000	337	22.1573	27.9823	22.4943	19.0517	22.841	23.7861
	0.178664	-1.09525	Spermidine synthase	Srm	15	15	60.9	60.9	34.019	323.31	1920400000	192	22.3044	27.5601	21.1769	19.9349	23.6273	22.8994
	0.332856	-1.09126	Heterogeneous nuclear ribonucleoprotein F;Heterogeneous nuclear ribonucleoprotein F, N-terminally processed	Hnrnpf	15	13	49.6	43.1	45.729	323.31	16860000000	363	25.3099	28.4474	25.2483	23.8774	24.4305	25.9377
	1.36201	-1.08054	Tubulin alpha-4A chain	Tuba4a	28	4	58.3	11.3	52.793	269.82	3277500000	163	23.8347	25.7248	23.9281	24.5327	23.9922	24.7391
	0.971719	-1.07304	Guanine nucleotide-binding protein subunit beta-2-like 1;Guanine nucleotide-binding protein subunit beta-2-like 1, N-terminally processed	Gnb2l1	18	18	71.3	71.3	35.076	323.31	3525900000	565	27.0165	27.7028	25.7921	28.1279	27.4392	27.6362
	0.625043	-1.0532	Ubiquitin-associated protein 2-like	Ubap2l	22	3	35.6	3.3	116.8	323.31	1804100000	226	25.2059	26.5008	24.1287	25.208	23.6498	24.4353
	0.305931	-1.04766	40S ribosomal protein S19	Rps19	15	15	66.9	66.9	16.661	173.81	3143400000	1121	25.4886	28.2128	29.0951	29.4865	29.6955	29.7228
	0.47509	-1.03518	UDP-glucose 6-dehydrogenase	Ugdh	35	35	73.8	73.8	54.831	323.31	33522000000	811	26.5007	29.4079	27.1572	26.3836	26.2241	27.196
	0.421504	-1.02901	40S ribosomal protein SA	Rpsa	15	15	63.4	63.4	32.85	323.31	3551100000	341	27.2236	27.5881	24.8715	27.9425	28.3797	28.0313
	0.197893	-1.02356	Nucleosome assembly protein 1-like 1	Nap1l1	12	10	41	38.3	42.732	323.31	3392700000	142	22.2264	26.4033	21.1322	19.7025	21.7065	22.0299
	0.722563	-1.02164	60S ribosomal protein L11	Gm10036;Rpl11;Gm5093	7	7	36	36	20.266	129.91	1612300000	375	27.1727	27.4619	28.1483	29.0569	27.4391	29.3062
	0.284076	-1.00233	Aldo-keto reductase family 1 member C13	Akr1c13	22	7	82.2	32.6	37.288	323.31	7041800000	316	24.2812	28.2374	24.8728	24.2877	24.1616	23.7975
	0.176423	-0.99547	5-3 exoribonuclease 2	Xrn2	33	33	41.9	41.9	108.69	323.31	1516600000	123	21.7554	27.059	22.0855	20.2119	21.6424	21.1988
	0.529515	-0.981325	Pyruvate kinase PKM	Pkm	50	49	77.4	75.3	57.844	323.31	61829000000	2874	29.6824	31.86	29.1859	29.2592	29.084	29.7771
	0.341707	-0.980203	Pre-mRNA-splicing factor ATP-dependent RNA helicase DHX15	Dhx15	23	22	32.8	31.7	91.006	90.974	451540000	104	20.5527	23.6222	24.3102	23.3898	23.5751	24.3665
	0.179893	-0.946178	Basic leucine zipper and W2 domain-containing protein 1	Bzw1	19	17	44.8	41.7	51.209	255.65	7111100000	103	21.6325	26.9255	23.7542	20.3291	22.6832	23.6539
	0.404257	-0.944708	Annexin;Annexin A1	Anxa1	30	30	73.7	73.7	38.734	323.31	17981000000	629	26.6039	29.5214	26.4818	26.6217	26.7193	26.4961
	0.240513	-0.861128	40S ribosomal protein S25	Rps25	5	5	29.6	29.6	13.742	42.408	2637400000	891	24.808	28.1829	28.7285	28.0321	29.122	29.0269
	0.142927	-0.858707	Alpha-centractin	Actr1a	17	7	54.5	27.7	42.613	323.31	3117800000	107	21.1593	26.0141	21.8205	19.2149	24.0527	24.3797
	0.155484	-0.822798	Clathrin heavy chain;Clathrin heavy chain 1	Cltc;mKIAA0034	93	93	60.8	60.8	191.98	323.31	30615000000	1746	24.9237	30.804	27.2505	24.6875	27.4429	26.5941
	0.646737	-0.764264	NADP-dependent malic enzyme;Malic enzyme	Me1	15	15	35.8	35.8	63.953	279.43	179620000	121	23.6363	23.2572	22.3738	24.2099	23.5361	24.372
	0.170177	-0.747179	Isoleucine--tRNA ligase, cytoplasmic	Iars	64	64	54.2	54.2	144.27	323.31	8380900000	383	25.0488	28.9962	24.9859	23.4352	25.1178	24.9627
	0.51354	-0.7293	TAR DNA-binding protein 43	Tardbp	11	11	54.5	54.5	33.634	323.31	1970100000	111	23.2353	25.0856	24.9226	24.104	24.2206	25.3768
	0.35522	-0.725158	Heat shock protein HSP 90-beta	Hsp90ab1	59	39	64.9	48.3	83.28	323.31	107640000000	4190	29.2686	31.9181	29.5935	29.1898	30.2716	30.2014
	0.135412	-0.718569	26S proteasome non-ATPase regulatory subunit 12	Psmd12	27	27	59.2	59.2	52.895	323.31	5540400000	154	22.3816	26.997	21.822	20.7541	23.7317	22.3399
	0.128842	-0.713858	Non-POU domain-containing octamer-binding protein	Nono	32	30	59.4	59.4	54.54	323.31	4409500000	1260	25.3542	24.5983	28.89	30.1123	24.986	26.6611
	0.128745	-0.645177	26S proteasome non-ATPase regulatory subunit 3	Psmd3	28	28	52.6	52.6	60.718	323.31	2396900000	110	22.0565	25.803	23.4035	19.9449	23.0312	24.679
	0.286977	-0.64463	Heat shock cognate 71 kDa protein	Hspa8	36	34	62.2	60.5	70.782	323.31	7189300000	1249	26.3849	29.1185	26.84	27.6053	28.4054	26.8405
	0.268303	-0.632442	60S ribosomal protein L30	Rpl30	7	7	59.6	59.6	12.656	323.31	2081000000	250	25.0904	27.7813	26.7882	25.0861	26.1235	27.0321
	0.199304	-0.599794	Heat shock protein HSP 90-alpha	Hsp90aa1	55	37	60	47.5	84.787	323.31	17078000000	1132	26.6915	29.2133	26.0556	25.3654	27.181	27.1488
	0.343801	-0.598431	Heterogeneous nuclear ribonucleoprotein D0	Hnrnpd	14	14	36.9	36.9	38.354	323.31	8085500000	399	25.4274	27.2709	27.6053	27.0808	25.8748	26.3511
	0.109481	-0.578384	ATP-dependent RNA helicase A	Dhx9	32	32	31.8	31.8	149.69	323.31	772770000	105	22.8316	25.9378	21.4865	19.5085	21.6431	22.25
	0.116541	-0.559355	Delta-1-pyrroline-5-carboxylate synthase;Glutamate 5-kinase;Gamma-glutamyl phosphate reductase	Aldh18a1	16	16	23.9	23.9	87.262	90.202	414720000	239	19.8831	22.5131	25.0013	22.9938	23.983	25.0385
	0.208237	-0.5385	Insulin-like growth factor 2 mRNA-binding protein 3	Igf2bp3	25	22	52	46.3	63.574	323.31	3331800000	566	24.7626	27.9883	25.946	25.5361	26.4927	25.2925
	0.144172	-0.508221	Hexokinase;Hexokinase-1	Hk1	20	16	25	21.2	101.87	179.99	732080000	132	21.3359	25.268	24.0352	21.8695	23.8182	23.5765
	0.117391	-0.504499	Peptidyl-prolyl cis-trans isomerase;Peptidyl-prolyl cis-trans isomerase A;Peptidyl-prolyl cis-trans isomerase A, N-terminally processed	Ppia	13	11	71.3	64	17.971	323.31	26479000000	651	28.2842	30.9873	27.6078	25.6352	27.5196	28.3026
	0.135724	-0.503032	Eukaryotic translation initiation factor 5A-1;Eukaryotic translation initiation factor 5A	Eif5a	15	15	87.7	87.7	16.832	323.31	5449400000	367	26.5232	29.1631	25.5269	24.6215	26.6629	26.4374
	0.218548	-0.492852	Phosphoglycerate kinase 1;Phosphoglycerate kinase	Pgk1	37	26	85.9	71.7	44.55	323.31	105980000000	1606	28.8447	30.5105	28.4346	27.8444	27.8487	28.2516
	0.104232	-0.475063	Ras GTPase-activating protein-binding protein 2	G3bp2	20	18	49.2	46.5	54.087	323.31	4624200000	1180	24.0769	26.0536	28.9816	28.1137	27.8713	28.1877
	0.071812	-0.471608	DNA helicase;DNA replication licensing factor MCM6	Mcm6	46	46	58.5	58.5	92.866	323.31	6055700000	274	21.8348	27.8707	23.7692	20.615	25.0049	23.538
	0.0989431	-0.443867	Spliceosome RNA helicase Ddx39b	Ddx39b	22	12	56.8	38.8	49.035	323.31	14331000000	425	24.8326	28.1616	25.4077	23.7885	23.7447	23.3665
	0.197885	-0.439768	Band 4.1-like protein 2	Epb4.1l2;Epb41l2	23	21	34.1	31.9	109.97	268.54	483250000	95	22.478	24.8731	23.6779	22.1666	23.0487	23.4841
	0.056474	-0.428048	Citrate synthase, mitochondrial;Citrate synthase	Cs	11	11	26.5	26.5	51.736	75.89	711040000	160	28.9815	24.3462	20.3223	26.7192	25.728	25.2505
	0.121755	-0.411989	Protein disulfide-isomerase A3	Pdia3	27	27	49.5	49.5	56.678	318.98	3458500000	338	25.8624	25.8703	26.7761	26.1364	22.9174	24.7851
	0.186438	-0.38852	Probable ATP-dependent RNA helicase DDX5	Ddx5	29	21	50.2	38	69.265	323.31	1926400000	623	24.2834	26.6053	26.2835	25.9042	26.7913	26.0144
	0.105481	-0.371058	Annexin A4;Annexin	Anxa4	27	26	69	66.8	35.915	323.31	24772000000	1436	27.9471	30.9019	28.1467	27.1683	27.9064	27.0432
	0.296718	-0.356436	Elongation factor 1-alpha;Elongation factor 1-alpha 1	Eef1a1	29	2	67.3	6.1	50.113	323.31	165070000000	5439	31.4976	31.5227	30.7979	32.3324	31.2975	30.8072
	0.13564	-0.355904	Polymerase I and transcript release factor	Ptrf	16	16	45.7	45.7	43.953	323.31	1856500000	81	23.0818	25.1806	23.0018	21.8444	23.3167	23.443
	0.163309	-0.341026	Tubulin beta-4B chain;Tubulin beta-4A chain	Tubb4b;Tubb4a	29	5	74.2	16.4	49.83	323.31	95832000000	3045	27.9503	30.3748	29.2306	28.29	29.6047	29.1438
	0.115901	-0.333731	RNA-binding protein EWS	Ewsr1	9	9	18.1	18.1	64.988	323.31	1480300000	386	23.777	26.0377	26.6679	26.079	24.8682	24.1975
	0.0600812	-0.321372	Transitional endoplasmic reticulum ATPase	Vcp	33	33	56.5	56.5	89.321	323.31	1349600000	145	26.4796	25.6878	21.8376	22.6634	21.766	22.6961
	0.110772	-0.313292	Eukaryotic initiation factor 4A-I	Eif4a1	30	16	68.9	42	46.022	323.31	83314000000	1430	28.234	30.3576	28.0087	26.8847	28.0901	28.0304
	0.162411	-0.297462	T-complex protein 1 subunit gamma	Cct3	38	38	62.4	62.4	60.629	323.31	8502100000	1185	27.3148	28.7343	26.8126	27.2722	28.5833	27.5966
	0.0398331	-0.289713	DNA damage-binding protein 1	Ddb1	36	9	37.5	10.9	126.85	323.31	766580000	160	26.0533	25.3657	19.276	21.1641	24.9859	24.6546
	0.0444061	-0.277098	Protein PRRC2C	Prrc2c	15	15	7.8	7.8	302.43	57.506	203670000	217	20.0467	21.1653	24.8227	24.4068	25.3608	25.4895
	0.266269	-0.275425	Elongation factor 1-gamma	Eef1g	27	27	65.2	65.2	50.06	323.31	53254000000	1355	28.2579	29.3862	28.2884	28.5537	28.575	28.0076
	0.0316815	-0.262285	Tripeptidyl-peptidase 2	Tpp2	53	1	51.7	1.2	139.88	323.31	4481000000	260	25.2695	28.2468	22.1361	20.3049	21.43	21.0708
	0.0663935	-0.241759	Galectin-2;Galectin	Lgals2	11	11	86.2	86.2	14.88	323.31	18654000000	969	27.7987	30.7968	28.8923	27.3139	27.7206	27.0261
	0.131425	-0.240879	Cofilin-1	Cfl1	19	18	84.9	80.7	18.559	323.31	19152000000	737	30.1666	31.0113	28.963	29.1633	30.1931	29.8708
	0.0258328	-0.228882		Hnrnpr	26	20	45.4	36.6	70.887	323.31	1395800000	421	29.4243	26.5662	25.6361	23.8501	19.5957	24.9264
	0.140917	-0.219584	60 kDa heat shock protein, mitochondrial	Hspd1	34	34	67.7	67.7	60.955	323.31	2746900000	499	25.86	27.3992	26.0853	25.5369	26.2978	25.9658
	0.04851	-0.211208	Leucine--tRNA ligase, cytoplasmic	Lars	49	49	48.6	48.6	134.19	323.31	2932400000	325	24.6814	27.7222	24.6543	22.6767	24.6505	24.221
	0.0225477	-0.193204	UPF0568 protein C14orf166 homolog	2700060E02Rik	12	12	58.6	58.6	28.152	91.673	1040800000	48	22.2628	27.9546	22.1828	19.8333	21.7578	18.9951
	0.0560155	-0.185333	Nucleolin	Ncl	15	15	24.5	24.5	76.864	76.865	429650000	347	24.9699	22.6556	23.3224	25.778	25.0556	25.4703
	0.187718	-0.174579	60S acidic ribosomal protein P0	Rplp0	15	15	51.7	51.7	34.216	323.31	5336400000	683	27.68	27.3442	27.5711	27.895	27.9687	28.5044
	0.120389	-0.114941	Unconventional myosin-Ic	Myo1c	22	22	26.9	26.9	121.94	139.65	310310000	198	24.2918	23.8547	23.7953	24.3453	24.5519	24.7838
	0.0227528	-0.0977224	Heat shock 70 kDa protein 4	Hspa4	33	30	55.6	51.1	94.208	323.31	576690000	134	24.2648	25.4381	22.6614	21.0565	23.9288	24.6534
	0.011332	-0.0891476	Ubiquitin thioesterase OTUB1	Otub1	14	14	57.2	57.2	31.27	323.31	3747600000	315	22.8706	28.4949	23.8986	19.7424	23.85	22.6494
	0.0736289	-0.0884482	Endoplasmin	Hsp90b1	28	26	39.3	37.5	92.489	291.92	1376300000	319	25.0597	25.3046	24.6523	24.259	25.1296	25.5432
	0.0202599	-0.0883255	Superkiller viralicidic activity 2-like 2	Skiv2l2;mKIAA0052	20	20	25.8	25.8	117.64	50.289	847190000	42	22.772	25.2016	22.1202	20.4041	22.1149	21.6663
	0.003211	-0.0317415	Macrophage migration inhibitory factor	Mif	7	7	90.4	90.4	12.504	252.33	3001800000	182	25.6798	30.5977	23.6658	19.6681	24.7989	23.9739
	0.00221305	-0.0112197	Valine--tRNA ligase	Vars	62	62	51.6	51.6	140.21	323.31	16127000000	965	26.9132	29.8083	26.1222	24.7524	26.5301	25.0385
	0.00522221	-0.00403786	Phosphoserine aminotransferase	Psat1	11	11	36.5	36.5	40.473	26.663	282860000	59	22.6526	22.8517	22.8328	22.5599	23.1721	23.2581
	0.0014539	0.00536156	Heterogeneous nuclear ribonucleoprotein A0	Hnrnpa0	12	12	49.2	49.2	30.53	323.31	3415000000	351	27.6106	27.9284	27.5351	27.229	25.074	25.0462
	0.0126262	0.0341771	Histone H4	Hist2h4;Hist1h4a	8	8	59.2	59.2	11.367	105.64	2649800000	342	26.0605	28.0429	28.8095	26.9406	28.1105	27.8946
	0.00939015	0.0595023	Proliferating cell nuclear antigen	Pcna	15	15	73.2	73.2	28.845	323.31	6822300000	534	25.6435	28.9204	25.9261	22.0763	26.8119	27.2063
	0.0698175	0.0968717	Elongation factor 1-delta	Eef1d	12	2	57.7	12.1	31.292	323.31	2724200000	461	26.6988	26.883	26.3278	26.0274	25.717	25.5427
	0.0868237	0.126521	40S ribosomal protein S3	Rps3	23	23	84	84	26.674	323.31	3629100000	1208	27.8415	27.181	28.3709	28.8061	27.7983	27.644
	0.0347604	0.157291	26S protease regulatory subunit 7	Psmc2	33	33	71.8	71.8	48.647	323.31	9573100000	278	25.0003	27.5248	24.0123	22.635	25.6636	24.0445
	0.0638671	0.160161	Tubulin alpha-1A chain;Tubulin alpha-3 chain	Tuba1a;Tuba3a	31	1	73.4	3.1	50.135	323.31	103610000000	2437	29.3353	30.8406	29.1732	28.0054	30.1424	29.3244
	0.0860674	0.18161	Heterogeneous nuclear ribonucleoprotein U	Gm28062;Hnrnpu	24	24	31.4	31.4	86.805	323.31	1940100000	514	27.8142	26.4415	26.9813	26.6484	25.2813	26.4421
	0.108174	0.19064		Actb	18	1	57	2.7	41.764	323.31	29509000000	2085	30.0449	28.6151	30.365	30.4518	29.4895	30.2607
	0.0348689	0.201495	Farnesyl pyrophosphate synthase	Fdps	17	17	57.5	57.5	40.581	323.31	9608100000	314	24.2726	28.8365	26.1889	22.5589	26.0632	24.5248
	0.0336614	0.208862	Dynactin subunit 2	Dctn2	17	17	47.8	47.8	44.116	287.52	2265900000	75	21.6614	25.7508	21.3637	19.3464	22.4476	19.749
	0.0334047	0.238214	Probable ATP-dependent RNA helicase DDX6	Ddx6	27	27	72.3	72.3	54.191	323.31	5193000000	240	27.1461	26.5396	26.1725	23.1412	20.3144	23.2375
	0.232044	0.246863	Isocitrate dehydrogenase [NADP], mitochondrial	Idh2	18	17	41.6	39.6	50.906	323.31	2276200000	253	25.8584	25.2229	26.1432	25.1636	24.9475	25.8221
	0.16004	0.286234	Aldehyde dehydrogenase, mitochondrial	Aldh2	13	12	31.8	30.3	56.537	165.33	372130000	64	22.9941	22.2714	24.0302	22.4917	22.1917	23.5942
	0.058223	0.330616	Protein kinase C and casein kinase substrate in neurons protein 2	Pacsin2	12	12	25.7	25.7	55.832	241.81	429110000	88	21.7904	25.439	22.5676	19.0477	23.9861	22.8656
	0.188987	0.346566	Guanine nucleotide-binding protein G(i) subunit alpha-2;Guanine nucleotide-binding protein G(i) subunit alpha-1	Gnai2;Gnai1	9	5	30.4	19.2	40.489	18.254	214070000	222	24.1987	22.4232	23.9229	23.9642	24.108	24.8025
	0.236015	0.373885	Guanine nucleotide-binding protein G(I)/G(S)/G(T) subunit beta-2;Guanine nucleotide-binding protein subunit beta-4	Gnb2;Gnb4	7	4	20.6	11.5	37.331	56.71	335800000	146	25.3982	23.7143	24.8578	24.9168	25.2838	25.787
	0.230928	0.379018	Insulin-like growth factor 2 mRNA-binding protein 2	Igf2bp2	25	23	43.8	40.5	65.583	323.31	2220800000	387	27.121	27.2573	26.8365	25.5	25.8949	25.9581
	0.106248	0.384917	Glyceraldehyde-3-phosphate dehydrogenase	GAPDH;Gapdh;Gm7293;Gm10481	22	4	62.5	8.7	35.81	323.31	77139000000	2246	31.2688	30.9814	28.2244	27.8902	29.075	28.5418
	0.133149	0.398059		Actg1	17	2	56	5.6	43.6	323.31	13781000000	361	28.9713	26.3693	28.0997	28.7346	26.1409	26.9138
	0.127556	0.431862	Ras GTPase-activating protein-binding protein 1	G3bp1	28	26	66.2	63.4	51.828	323.31	13775000000	3522	28.1939	27.3054	31.1352	30.2185	29.0649	29.5745
	0.0946968	0.447985	Malate dehydrogenase, mitochondrial	Mdh2	13	13	50.3	50.3	35.611	22.528	144160000	60	24.322	21.5745	23.049	25.1323	21.1256	20.4458
	0.0992099	0.450502	Splicing factor, proline- and glutamine-rich	Sfpq	32	30	45.4	43.9	75.441	323.31	5769100000	2285	27.7232	26.4328	30.9911	30.5877	27.7123	28.0547
	0.203282	0.473117	Ubiquitin-associated protein 2	Ubap2	21	21	34.5	34.5	117.83	323.31	1151300000	376	25.176	25.9609	24.0523	23.4433	25.7225	24.1272
	0.0636654	0.483627	Cullin-associated NEDD8-dissociated protein 1	Cand1	45	44	41.1	40.5	136.33	323.31	4150500000	340	26.0666	28.2383	23.1963	19.5716	24.1473	24.1494
	0.0767245	0.547266	THO complex subunit 4	Alyref	8	8	36.5	36.5	26.94	285.08	463660000	342	27.296	24.7324	28.2658	24.6051	20.3024	24.8848
	0.561057	0.54768	Acetyl-CoA acetyltransferase, mitochondrial	Acat1	9	9	33.3	33.3	44.802	196.54	615750000	44	23.3939	22.807	24.4913	23.3545	23.7125	23.7932
	1.30449	0.603902	CDKN2A-interacting protein	Cdkn2aip	15	15	40.7	40.7	59.744	323.31	217460000	76	24.1282	23.6077	23.9865	22.9813	23.8336	23.5476
	0.0891772	0.614457	Twinfilin-1	Twf1	12	12	40.3	40.3	40.079	323.31	1043900000	90	23.7911	26.8059	23.0985	18.6585	24.6873	24.2692
	0.156385	0.715224	Serine hydroxymethyltransferase	Shmt2	13	12	25.9	23.2	55.42	19.167	519000000	112	23.8505	20.1686	23.6196	23.7488	24.5587	25.9657
	0.207825	0.728443		Ptbp3	20	2	50.1	2.7	59.465	323.31	3430800000	271	27.4554	25.1934	24.9168	24.0714	22.9844	23.9065
	0.166424	0.767573	Protein disulfide-isomerase A6	Pdia6	14	14	47.4	47.4	48.689	323.31	3491500000	100	25.1374	25.8744	23.3786	20.2189	23.6609	23.781
	0.267815	0.842986	Annexin;Annexin A2	Anxa2	27	27	68.1	68.1	38.676	323.31	4510700000	786	29.4907	26.5336	27.0457	27.2435	25.4502	25.6807
	0.412433	0.84794	L-lactate dehydrogenase;L-lactate dehydrogenase A chain	Ldha	17	17	49.4	49.4	36.498	182.05	2138400000	616	27.6856	26.0178	27.0881	26.265	28.5008	28.4479
	0.695417	1.08797	Annexin;Annexin A3	Anxa3	21	21	54.8	54.8	36.356	323.31	2568100000	778	27.4755	25.9766	26.5882	24.9465	27.3429	27.2195
	0.39185	1.13299	Lupus La protein homolog	Ssb	18	18	37.3	37.3	47.657	225.1	775440000	189	25.0979	22.8611	26.772	26.4721	24.8853	24.0231
	0.213228	1.15761	RNA-binding protein FUS	Fus	11	9	57.7	57.7	13.897	323.31	6368000000	1449	25.2884	24.7974	30.985	29.3344	28.5512	27.2199
	0.313941	1.15835	RNA binding motif protein, X-linked-like-1	Rbmxl1	23	3	50	10.6	42.161	261.56	3749900000	877	26.95	24.7037	29.8219	28.6296	26.7334	26.697
	0.72132	1.213	Cleavage and polyadenylation specificity factor subunit 5	Nudt21	13	13	54.2	54.2	26.24	104.92	651600000	378	28.2739	26.3565	27.8172	26.1232	25.8246	25.797
	0.54007	1.22559	Tubulin beta-5 chain	Tubb5	28	5	70	16.2	49.67	323.31	19875000000	394	27.138	27.9121	26.9793	24.613	27.5971	25.5126
	1.18829	1.25514	Heterogeneous nuclear ribonucleoprotein A1;Heterogeneous nuclear ribonucleoprotein A1, N-terminally processed	Hnrnpa1	21	19	58.8	55.9	34.238	323.31	8551800000	2034	30.1721	28.2361	30.6178	29.7	29.7311	28.8195
	0.271486	1.2856	Heterogeneous nuclear ribonucleoprotein A3	Hnrnpa3	26	8	56.9	10.7	34.376	323.31	9617500000	1220	26.9046	27.5627	32.0704	27.2281	26.1129	26.4402
	0.409592	1.4154	Myoferlin	Myof	21	21	12.1	12.1	233.32	67.334	284320000	361	24.1551	20.6973	25.0536	24.2341	25.3957	25.4268
	0.212727	1.47339	Heterogeneous nuclear ribonucleoprotein U-like protein 2	Hnrnpul2	22	22	34.6	34.6	84.939	146.81	320700000	109	27.8213	22.2844	24.5797	23.6729	18.9986	21.0222
	0.636068	1.47766	Cleavage and polyadenylation specificity factor subunit 6	Cpsf6	9	9	22.8	22.8	59.308	39.681	194730000	131	25.4035	22.1621	24.9305	22.6821	24.3336	25.3903
	0.772595	1.5749	Protein PRRC2A	Prrc2a	30	30	24	24	191.12	128.52	343990000	368	23.6249	22.9514	26.6614	23.3795	24.8158	24.0464
	1.42923	1.6824	Histone H2B;Histone H2B type 1-P;Histone H2B type 1-K;Histone H2B type 1-C/E/G;Histone H2B type 2-B;Histone H2B type 1-H;Histone H2B type 1-B;Histone H2B type 1-M;Histone H2B type 1-F/J/L;Histone H2B type 3-A;Histone H2B type 3-B;Histone H2B type 2-E;Histone H2B type 1-A	Hist1h2bj;Hist1h2bk;Hist1h2bm;Hist1h2br;LOC665622;Hist1h2bp;Hist1h2bc;Hist2h2bb;Hist1h2bh;Hist1h2bb;Hist1h2bf;Hist1h2ba;Hist3h2ba;Hist3h2bb;Hist2h2be	6	6	42.3	42.3	13.579	73.48	1161600000	222	27.1895	26.1111	27.3862	24.6477	27.5946	26.3643
	0.840822	1.71182	Caprin-1	Caprin1	22	22	34.5	34.5	78.168	323.31	4301200000	981	28.5915	25.1395	28.9223	28.1859	28.5924	27.6454
	0.416675	1.71525	Heterogeneous nuclear ribonucleoproteins A2/B1	Hnrnpa2b1	20	19	49.6	49.6	37.402	323.31	7541400000	1764	27.8932	26.462	31.867	28.4632	26.5273	26.2166
	1.00555	1.78523	Galectin;Galectin-4	Lgals4	6	6	28.1	28.1	33.944	24.945	262920000	48	24.9772	23.0017	23.3545	20.8789	23.4126	22.508
	0.500732	1.87757	Isocitrate dehydrogenase [NAD] subunit alpha, mitochondrial	Idh3a	8	8	25.4	25.4	39.638	17.912	127450000	91	24.2353	21.5377	23.0285	19.2873	23.982	24.7881
	0.324237	2.11928	Monofunctional C1-tetrahydrofolate synthase, mitochondrial	Mthfd1l	13	12	14.7	14	105.73	27.468	92764000	86	21.8081	16.0998	23.9267	23.0502	24.1947	24.4217
	0.329575	2.12399	Heterogeneous nuclear ribonucleoprotein Q	Syncrip	32	3	56	9	69.632	323.31	13759000000	1215	32.3533	29.3707	25.6007	24.6055	26.7273	24.3331
	0.711162	2.21167	ATP synthase subunit alpha, mitochondrial;ATP synthase subunit alpha	Atp5a1	16	16	32.4	32.4	59.752	103.5	1898000000	397	26.426	22.224	27.7909	25.2645	26.7674	26.8608
	0.770172	2.3446	Leucine-rich PPR motif-containing protein, mitochondrial	Lrpprc	14	14	11.4	11.4	156.61	31.395	64917000	78	23.8931	22.5344	24.3022	18.969	23.9216	23.5797
	1.82154	2.36474	Cleavage and polyadenylation specificity factor subunit 7	Cpsf7	12	12	32.3	32.3	52.01	182.06	1106500000	97	26.0123	23.9415	25.7158	22.4666	24.7387	22.9645
	0.578879	2.58737	Polypyrimidine tract-binding protein 1	Ptbp1	22	4	62.2	9.5	56.891	323.31	29127000000	1483	33.1797	28.4488	27.1641	26.0847	28.297	26.3451
	0.713832	2.79321	Heterogeneous nuclear ribonucleoprotein A/B	Hnrnpab	17	17	37	37	29.922	323.31	7166400000	491	30.0859	27.4751	27.1024	25.3417	26.5879	22.5798
	0.421369	2.79941	Leucine-rich repeat-containing protein 59	Lrrc59	11	11	45.3	45.3	34.877	205.16	348570000	306	26.8148	17.5741	24.8956	26.0727	26.0629	25.7282
	0.54442	3.30445	ADP/ATP translocase 1	Slc25a4	11	5	36.2	17.1	32.904	11.778	240340000	243	26.5869	17.9785	27.5272	25.5476	25.3615	26.0362
	1.2349	3.47823	Small nuclear ribonucleoprotein Sm D1	Snrpd1	3	3	37	37	13.281	16.031	133780000	62	23.9977	23.0283	25.0454	20.2776	23.4893	18.7919
	1.3139	3.52208	U2 small nuclear ribonucleoprotein A	Snrpa1	7	7	32.5	32.5	28.357	126.17	116500000	44	25.0163	21.1765	23.1003	19.4411	21.6029	18.5357
	1.24249	3.52438	Heterogeneous nuclear ribonucleoproteins C1/C2	Hnrnpc	10	10	29.3	29.3	36.905	27.847	565160000	72	25.9775	23.026	23.6515	19.1945	23.931	20.7664
	0.563816	4.36096	ADP/ATP translocase 2;ADP/ATP translocase 2, N-terminally processed	Slc25a5	12	6	36.9	17.8	32.931	24.168	912130000	698	28.2172	17.083	28.5844	26.5368	27.9415	28.0404
