# Supplementary material for: Negative regulation of miRNA sorting into EVs is mediated by the capacity of RBP PCBP2 to impair the SYNCRIP-dependent miRNA loading
Source: eLife. 2025 Jul 2;14:RP105017. doi: 10.7554/eLife.105017 (PMC12221297; doi:10.7554/eLife.105017)
Supplement: Supplementary file 2. [file elife-105017-supp2.xlsx]

## Sheet: Foglio1
Significant	-LOG (P-value)	Difference mi155 MUT -WT	Protein names	Gene names	RBP Type	RNA Binding domain(s)	Peptides	Unique peptides	Sequence coverage [%]	Unique sequence coverage [%]	Mol. weight [kDa]	Score	Intensity	MS/MS count	LFQ intensity 1mir155MUT	LFQ intensity 1mir155WT	LFQ intensity 2mir155MUT	LFQ intensity 3mir155WT	LFQ intensity 4mir155MUT	LFQ intensity 4mir155WT
+	3.07539	-6.59577	60S ribosomal protein L32	Rpl32	Canonical_RBP	|Ribosomal_L14|	6	6	41.5	41.5	15.86	28.839	560340000	155	20.2874	25.566	19.79	27.6264	19.1303	25.8027
+	3.96835	-6.25623	Calponin;Calponin-2	Cnn2	No RBP	N.A.	14	13	58.7	55.1	33.155	208.32	1870500000	248	19.6766	26.8261	19.8667	25.5203	19.7534	25.7189
+	2.16669	-5.5011	Hydroxymethylglutaryl-CoA synthase, cytoplasmic	Hmgcs1	No RBP	N.A.	20	18	52.3	44	57.552	323.31	4660600000	102	18.8804	26.7469	18.8796	23.5992	19.8759	23.793
+	2.60074	-4.96522	NEDD8-conjugating enzyme Ubc12	Ube2m	No RBP	N.A.	8	8	42.1	42.1	20.9	70.197	210620000	133	19.869	25.2318	19.2086	23.013	18.6574	24.3859
+	2.19534	-4.90656	Fructose-bisphosphate aldolase;Fructose-bisphosphate aldolase A	Aldoa	Non-canonical_RBP	N.A.	31	2	80.8	3.6	39.355	30.295	2938900000	36	20.1068	25.8555	18.6575	23.2279	19.1	23.5006
+	2.72429	-4.7205	Sorting nexin-3	Snx3	No RBP	N.A.	12	10	69.8	65.4	18.762	133.02	1156200000	86	20.8314	26.5733	20.1611	24.9897	21.0929	24.6839
+	2.3766	-4.38583	Zinc finger C2HC domain-containing protein 1A	Zc2hc1a	No RBP	N.A.	11	11	39.8	39.8	35.152	22.679	361900000	48	18.1019	23.3608	20.5218	24.1486	19.1247	23.3964
+	3.1918	-4.21733	Protein disulfide-isomerase	P4hb	Non-canonical_RBP	N.A.	19	19	45.9	45.9	56.6	323.31	1052800000	71	20.2406	24.8723	19.8679	24.5048	20.0763	23.4596
+	2.7127	-4.20661		Serpinb9b	No RBP	N.A.	14	13	39.5	37.1	42.733	140.19	1519900000	70	19.1239	24.6879	20.2747	23.9483	19.656	23.0382
+	2.24657	-4.10629	Nascent polypeptide-associated complex subunit alpha;Nascent polypeptide-associated complex subunit alpha, muscle-specific form	Naca	Non-canonical_RBP	N.A.	5	5	32.6	32.6	23.384	158.02	414350000	110	20.4399	23.3141	19.6843	25.4869	19.7101	23.3522
+	2.1428	-4.00289	Copine-1	Cpne1	Canonical_RBPs	|RRM1|	13	12	31.9	30.2	58.886	323.31	533970000	83	20.1184	25.4311	20.1983	22.8211	19.5954	23.6686
+	2.01035	-3.99564	La-related protein 1	Larp1	Canonical_RBPs	|La|	21	21	27.2	27.2	121.15	315.3	391660000	68	18.4164	24.7428	20.2153	23.577	20.5967	22.8954
+	2.36859	-3.6063	Bifunctional lysine-specific demethylase and histidyl-hydroxylase MINA	Mina	No RBP	N.A.	10	10	25.6	25.6	53.516	35.021	653840000	18	18.7632	23.9407	19.539	22.4472	19.3332	22.0662
+	2.24306	-3.48084	Cell growth-regulating nucleolar protein	Lyar	Non-canonical_RBP	N.A.	9	9	20.6	20.6	43.735	28.759	424970000	24	20.7135	22.6044	18.6944	23.4774	19.6001	23.3687
+	2.0226	-3.37793	Replication factor C subunit 3	Rfc3	No RBP	N.A.	9	9	34.4	34.4	30.637	158.1	320100000	30	19.4892	23.7231	19.8892	21.6127	18.5785	22.7549
+	2.01271	-3.3268	Poly(rC)-binding protein 2	Pcbp2	Canonical_RBP	|KH_2|KH_1|	17	5	58.4	18.3	38.15	323.31	14782000000	355	23.8676	28.8213	24.1497	26.5491	24.7957	27.4229
+	2.22497	-3.15906	Double-stranded RNA-binding protein Staufen homolog 1	Stau1	Canonical_RBP	|dsrm|Staufen_C|	9	9	24.3	24.3	53.746	95.568	213880000	41	21.0396	22.6373	20.3697	24.3556	20.1807	24.0742
+	2.01902	-3.15318	Tumor susceptibility gene 101 protein	Tsg101	No RBP	N.A.	15	15	38.9	38.9	44.123	323.31	1536400000	59	20.5278	24.6589	21.1759	23.8276	19.9789	22.6556
+	1.91377	-3.11675	Zinc finger CCCH domain-containing protein 15	Zc3h15	Canonical_RBPs	|zf-CCCH|zf-CCCH_2|	8	8	24.9	24.9	48.327	269.04	670300000	28	20.308	23.9133	19.6821	23.263	19.4855	21.6495
+	2.55267	-2.77073	p21-activated protein kinase-interacting protein 1	Pak1ip1	No RBP	N.A.	10	10	29.7	29.7	41.058	265.22	609970000	20	19.7392	23.3894	20.0529	22.3167	19.668	22.0662
+	2.21593	-1.50669	T-complex protein 1 subunit delta	Cct4	Non-canonical_RBP	N.A.	34	34	69.8	69.8	58.066	323.31	15898000000	941	26.2303	28.1727	26.2186	27.905	27.0375	27.9287
+	1.82043	5.42281	Prohibitin-2	Phb2	Non-canonical_RBP	N.A.	9	9	31.4	31.4	33.296	24.432	60979000	82	25.2969	17.5784	25.9885	20.3693	22.6063	19.6755
