# Supplementary material for: Negative regulation of miRNA sorting into EVs is mediated by the capacity of RBP PCBP2 to impair the SYNCRIP-dependent miRNA loading
Source: eLife. 2025 Jul 2;14:RP105017. doi: 10.7554/eLife.105017 (PMC12221297; doi:10.7554/eLife.105017)
Supplement: Supplementary file 3. [file elife-105017-supp3.xlsx]

## Sheet: Foglio 1
miRNA	baseMean	log2FoldChange	lfcSE	stat	pvalue	padj	cell_shCTR_1 counts	cell_shCTR_2 counts	cell_shP2_1 counts	cell_shP2_3 counts	EV_shCTR_1 counts	EV_shCTR_2 counts	EV_shP2_2 counts	EV_shP2_3 counts
mmu-miR-345-3p	766.557542855101	9.49816710547501	1.67488430052953	46.9699070577239	7.2085069156977e-12	6.48765622412793e-10	1515	1281	689	1031	0	0	126	73
mmu-miR-23a-5p	70.978394300526	9.22871146541638	2.70064416622675	10.4504306249466	0.00122620865542898	0.0169782736905551	95	75	68	77	0	0	205	36
mmu-miR-328-3p	129.784193600948	9.22167358100251	2.35412457568158	14.3660974317976	0.00015048755486966	0.0030097510973932	178	188	70	236	0	0	116	101
mmu-miR-214-3p	135.475389814875	6.70827674054656	2.15286487875564	9.88513410512527	0.00166619387291532	0.0214224926517685	32	18	0	0	343	347	464	200
mmu-miR-145a-5p	121.386671936087	5.56530860677024	2.28345970125862	6.0897026938604	0.0135971964707757	0.135971964707757	10	15	0	0	441	235	225	310
mmu-miR-335-5p	170.41134100603	3.7955855626023	1.45921392222073	6.35566054798147	0.0117007371944516	0.129319076722288	221	314	29	32	150	112	429	88
mmu-miR-504-3p	51.6200678451196	3.16810947009624	2.97087093911143	1.08716684333564	0.297099798345279	0.972326612766367	89	10	3	16	113	4	216	44
mmu-miR-3102-3p	277.147596919165	3.04074386296043	4.47067128847263	0.442776818835725	0.505785239235121	0.991839832975996	560	474	178	210	0	92	388	0
mmu-miR-99b-3p	6453.72611786774	2.6062281379876	2.43792437622645	1.10639140225484	0.292867724930768	0.972326612766367	11127	11350	6258	9575	153	0	518	257
mmu-miR-350-3p	232.235950547859	2.51122680104716	4.34569474747875	0.323953552180171	0.569241335957108	0.991839832975996	531	539	71	133	0	77	0	92
mmu-miR-92b-3p	59.3604986342419	2.25944027892905	3.42821526300105	0.423948917313382	0.514973159379528	0.991839832975996	35	29	13	38	0	80	99	257
mmu-miR-181a-2-3p	60.7771962646031	2.15491720733427	4.75828031046804	0.200577466353508	0.65425513504174	0.991839832975996	0	35	13	7	153	0	204	214
mmu-miR-128-3p	596.83112880792	1.92932685057417	2.95410425043319	0.418886787314406	0.517493039007762	0.991839832975996	842	984	507	745	235	0	363	336
mmu-miR-150-5p	1656.06656722295	1.90665631382999	0.891810383842007	4.53828470406157	0.0331447890517871	0.255743537756871	87	41	16	8	5575	3658	3827	3931
mmu-miR-494-3p	83.0380072888895	1.86950044508508	3.61714258716241	0.263826694192304	0.607503269324202	0.991839832975996	19	0	0	3	272	206	156	184
mmu-miR-140-5p	5555.8704718652	1.84206261400296	1.01592501328894	3.23607467927761	0.0720330288114227	0.432198172868536	10225	8659	6857	7266	167	63	608	159
mmu-miR-301a-3p	7444.07523906873	1.82769333690442	1.29146767461453	1.97083400904057	0.160359364436075	0.740120143551115	11933	12274	8467	11357	153	179	1131	114
mmu-miR-30a-5p	3849.49447445325	1.7706312706424	2.21537297707502	0.62918171032932	0.427655626839247	0.991839832975996	7033	6630	4018	5085	195	1	343	183
mmu-miR-376c-3p	124.351940891135	1.73734813289886	3.32732475070447	0.269969341923371	0.603352338725652	0.991839832975996	8	0	0	4	131	298	361	523
mmu-miR-148a-3p	284.409598471955	1.69284656719846	1.39155328684286	1.46205120057968	0.226604035107627	0.906416140430509	75	42	7	32	548	650	964	620
mmu-miR-143-3p	488.443655884978	1.57242719524651	1.42439390653374	1.20509813326743	0.27230510149711	0.961076828813329	138	42	21	47	1445	601	1045	1650
mmu-miR-181a-5p	31311.799933987	1.37039206140552	0.347487595064726	15.411522734895	8.64594759725035e-05	0.00222324366786438	69079	58992	21723	28761	3926	3222	5536	3294
mmu-miR-378c	28.820539635212	1.34441547128461	2.60234087434908	0.268505624071643	0.604335978271701	0.991839832975996	39	26	45	63	0	1	2	3
mmu-miR-365-3p	330.872809915807	1.34258149707492	2.9397871262355	0.206813577420164	0.649276436039284	0.991839832975996	668	480	310	442	42	19	133	0
mmu-miR-351-5p	3156.6844903044	1.32264980474231	0.39518892383968	11.1370849483655	0.000846187649467695	0.0126928147420154	5791	5606	3139	4032	128	118	278	187
mmu-miR-27b-5p	7826.62389901344	1.25375121219483	3.73466378885834	0.111845429669131	0.738052843171906	0.991839832975996	13195	12866	8886	11909	0	162	419	0
mmu-miR-106a-5p	145.047250416335	1.25355929326831	1.85102853905106	0.460477325341898	0.497400979024095	0.991839832975996	219	364	108	163	1	2	3	1
mmu-miR-423-3p	516.349223007162	1.23330958568676	0.580010217513971	4.48972621022783	0.0340991383675828	0.255743537756871	706	641	321	309	380	478	556	563
mmu-miR-503-5p	7107.84254734663	1.23254437071014	0.364488105690402	11.3601386402537	0.000750372230245616	0.0122788183131101	14109	12366	6585	8734	363	276	534	494
mmu-let-7d-3p	445.667027414152	1.14437428403883	1.63815286416281	0.484925279582711	0.486199796725797	0.991839832975996	533	694	277	246	601	169	790	114
mmu-miR-125a-3p	5259.27780092272	1.10823967892562	2.62362509690414	0.177383779563613	0.673631286695341	0.991839832975996	9397	7795	6372	7922	183	0	345	61
mmu-miR-486b-5p	11133.7434633972	1.06414044173115	0.297042017549839	12.8619086183663	0.000335338399728398	0.00603609119511117	210	155	67	85	30824	26358	33508	26246
mmu-miR-1247-5p	79.0638386040659	1.0289871145955	3.44584312223172	0.0887106113153067	0.765822790532398	0.991839832975996	113	52	16	11	89	243	0	123
mmu-miR-374b-5p	14485.4216860813	1.00856737303274	0.449715942848016	5.00473110596658	0.0252781299561375	0.22088166715348	27062	20694	16359	21150	588	876	1451	1327
mmu-miR-486a-5p	11232.931029642	1.00821618429062	0.262811821183457	14.7912534279242	0.00012009121684018	0.00270205237890406	193	155	68	85	30647	26695	34143	26618
mmu-miR-222-3p	3097.63935346022	0.985122736595217	0.885465030589731	1.23224226328756	0.266971414042618	0.961076828813329	5677	4980	3551	4058	210	63	230	220
mmu-miR-1a-3p	21.9183630653392	0.950392819026784	4.85379055742922	0.0381894904663795	0.845063131107666	0.991839832975996	6	20	19	52	10	0	65	0
mmu-miR-296-3p	2795.25650514848	0.930989852995018	3.93953295591707	0.0556198706876074	0.813557872526221	0.991839832975996	4443	5148	3280	3612	0	184	341	0
mmu-miR-99b-5p	33175.6068914203	0.891061770242256	0.354897205886228	6.27961424327154	0.012213468357105	0.129319076722288	76256	54677	27708	33290	4018	2709	4096	2904
mmu-miR-671-5p	10694.4132041669	0.879805026262743	0.623862630343745	1.98129609335075	0.15925393260587	0.740120143551115	20717	16261	9390	11977	2512	2230	4569	1704
mmu-miR-181b-5p	29811.4904266243	0.85133787991724	0.506945567914156	2.81068845811322	0.0936381828152817	0.510753724446991	54623	56700	27630	37653	821	761	1421	628
mmu-miR-196a-5p	4881.65466732277	0.82728684144861	3.69921057505581	0.0498610177499614	0.823305289850537	0.991839832975996	9411	11140	3634	4642	0	173	167	0
mmu-miR-126a-3p	2151.05237476373	0.73374292917656	0.399484138969239	3.3647414213882	0.0666060396213647	0.428181683280202	2108	2218	1524	1829	1986	1748	2827	2824
mmu-miR-151-3p	7388.38629470341	0.729128314374522	0.425860650136209	2.92409718748877	0.0872660251197576	0.490871391298637	13702	13763	5967	8114	1361	987	1450	941
mmu-miR-15a-5p	11825.7598672426	0.707569144756437	0.498640482834188	2.00860905542061	0.156408662936022	0.740120143551115	21282	16987	12636	16308	1172	1852	2747	1813
mmu-miR-146b-5p	425.689422134578	0.703063067834275	4.28527522513097	0.0268565112348398	0.869825955779304	0.991839832975996	612	601	490	706	105	0	0	174
mmu-miR-125a-5p	9988.47900245921	0.682781127224606	0.585997371520132	1.35448353884212	0.244495825265615	0.93636699037895	15121	19039	7908	10317	4195	2147	3503	2852
mmu-miR-342-3p	7641.94366679282	0.627615104036562	0.347545783778047	3.25510725713711	0.0712012788697071	0.432198172868536	16674	12958	5353	6229	2669	1973	2023	1359
mmu-miR-188-5p	1170.93739645204	0.594991757134122	3.94617198084383	0.0227021996107339	0.880234074284985	0.991839832975996	2487	1756	1179	1508	0	115	151	0
mmu-miR-877-5p	365.031722091618	0.566774482202225	1.03253384475744	0.300904075887999	0.583316200783333	0.991839832975996	709	395	281	533	102	126	207	103
mmu-miR-129-5p	15775.0896904753	0.54798883388867	1.15007669563388	0.226723244037601	0.633964210287275	0.991839832975996	33604	38315	7784	11186	1466	1455	1278	160
mmu-miR-96-5p	15932.4982203696	0.53214683159231	0.716128733208891	0.551427563998431	0.457734978276807	0.991839832975996	31855	24620	16090	22853	188	443	477	298
mmu-miR-375-3p	40.6087934369704	0.524897997615949	5.11187902384789	0.0105315489406053	0.918261921757204	0.991839832975996	25	28	7	13	183	0	126	0
mmu-miR-378a-3p	1525.59138154371	0.460579114480255	1.2972344940476	0.125918555285821	0.722701933484154	0.991839832975996	1715	1588	2392	2779	64	342	456	586
mmu-miR-206-3p	10742.7837313719	0.433458646668832	0.72750053162966	0.354500214605309	0.551576656088842	0.991839832975996	15420	17476	12252	19342	86	99	96	178
mmu-miR-1839-5p	2296.46887713434	0.428483411046627	0.593749335235325	0.520316909665638	0.470706528659596	0.991839832975996	3910	3292	2180	3472	473	326	484	507
mmu-miR-139-5p	11790.6642341968	0.411535759274293	0.434866533996756	0.89482584949161	0.34417289031323	0.991839832975996	20156	18430	9700	14081	4494	3074	3691	3601
mmu-miR-18a-5p	33831.8696484379	0.400535053106705	0.511055224927167	0.613764382028933	0.433373964139088	0.991839832975996	55680	55897	34040	50790	3754	2099	3350	3489
mmu-miR-185-5p	5998.14435523188	0.385435755048404	0.699894886142442	0.303081385441274	0.581957086489138	0.991839832975996	9144	8949	6359	9668	1041	528	1461	732
mmu-miR-92a-3p	10639.0442693695	0.343177653572114	0.494194825874628	0.481949174396931	0.487540744789573	0.991839832975996	16979	15819	8764	13784	4311	3189	4990	2909
mmu-miR-421-3p	1622.21034002863	0.317609840534869	1.20743656605529	0.0691715987588424	0.792546771122475	0.991839832975996	2235	2886	1699	2285	221	286	528	94
mmu-miR-25-3p	54565.7004785222	0.29472929557532	0.282215506903493	1.09017240250856	0.296433013208471	0.972326612766367	91876	88577	54803	76009	7307	7282	8124	7262
mmu-miR-10b-5p	1626.33469836133	0.283881879097885	0.688947006860502	0.169710635253836	0.680369103387268	0.991839832975996	2301	2082	838	1013	1980	1737	841	1359
mmu-miR-125b-5p	54939.3313650337	0.265507688891191	0.240654969164747	1.21683964576289	0.269981765646929	0.961076828813329	96232	95410	58780	66159	6412	5637	6911	4452
mmu-miR-210-3p	2369.96302198938	0.261154263415627	3.8894782395667	0.00450977638253391	0.946458413578122	0.991839832975996	3880	3413	2823	4030	150	0	0	175
mmu-miR-324-5p	24675.2690374577	0.243285207896304	0.35067416351165	0.481262715478735	0.487850914463996	0.991839832975996	46506	37463	26532	37495	520	403	584	417
mmu-miR-30e-3p	3672.38172113691	0.169487813795137	1.50229605115319	0.0127290602621315	0.910170774716299	0.991839832975996	6325	5880	3681	4958	1043	117	894	237
mmu-miR-362-5p	3355.24765248056	0.128289776304226	1.14286128483801	0.0126045619072102	0.910609296115444	0.991839832975996	6446	5596	3104	4460	390	175	406	81
mmu-miR-122-5p	912.1566564794	0.126513526788251	1.01011688245324	0.0156857069157894	0.900331498936101	0.991839832975996	455	485	356	469	2327	795	1556	1872
mmu-miR-450a-5p	1431.2216000991	0.118892976172244	1.1634562986502	0.0104416689367213	0.918610242612204	0.991839832975996	2674	2374	1390	1901	49	204	114	103
mmu-miR-7a-1-3p	80.153626104925	0.116650834240984	4.69545784599987	0.000617827574870944	0.980169713562804	0.991839832975996	118	82	88	85	0	90	116	0
mmu-miR-155-5p	5771.40701331958	0.116050814158532	0.446180017272924	0.0676413174540755	0.794802493380662	0.991839832975996	9294	10334	6463	7865	260	354	318	261
mmu-miR-194-5p	188764.373456551	0.113970702685283	0.263047424471493	0.187719580414722	0.664821406828734	0.991839832975996	342726	280114	218474	289654	4749	3938	5454	3784
mmu-miR-505-5p	284.701819554902	0.0995640778666727	1.28201277612274	0.00603144076711715	0.938096643143376	0.991839832975996	325	234	189	256	466	163	216	394
mmu-miR-100-5p	21412.1346436354	0.0983122575813648	0.492933901569407	0.0397752068917896	0.841920743628263	0.991839832975996	37213	31808	20920	34588	2169	1984	1873	2306
mmu-miR-99a-5p	2340.99753100278	0.0866708475058643	0.539844901929648	0.0257760679037631	0.872448413576398	0.991839832975996	2981	1895	1354	1946	2780	2768	2961	1910
mmu-miR-22-3p	6649.80286739962	0.0833519679612803	0.941172785095802	0.00784362479349454	0.92942822787625	0.991839832975996	12077	9170	7699	10479	556	170	296	456
mmu-miR-194-2-3p	904.876464986775	0.0750809063996761	0.803641276425424	0.00872926995081968	0.925561511586344	0.991839832975996	946	1018	792	1042	809	547	1144	483
mmu-miR-7a-5p	5665.04632812902	0.0546481299769891	0.728904174988883	0.00562392478444451	0.940220415424602	0.991839832975996	7464	9005	6719	10658	164	85	216	111
mmu-miR-30d-5p	6674.94753580858	0.0381683839152381	0.565275606620499	0.00456020528184808	0.946160343575921	0.991839832975996	10955	11110	7192	8913	986	824	1159	502
mmu-miR-183-5p	2459.82989482202	0.0380254491133828	3.72679546636517	0.000104600344656092	0.991839832975996	0.991839832975996	4029	4145	2700	3816	0	100	0	90
mmu-miR-20a-5p	126240.713576332	0.0158382111808842	0.369576527914833	0.00183677778872493	0.965815011599639	0.991839832975996	200066	224711	132812	184177	8709	6226	6675	6497
mmu-miR-296-5p	301.447851158501	-9.52810152906067	1.83072032521119	32.0608447030754	1.49418662916635e-08	6.72383983124858e-07	563	372	304	393	189	117	0	0
mmu-miR-872-5p	14956.0118802383	-9.12137382420465	1.5498738284394	71.0004287408285	3.57147268626929e-17	6.42865083528473e-15	29629	25767	15851	18554	99	176	0	0
mmu-miR-17-3p	2286.62227788298	-9.03253823541733	1.96962193707332	22.4519139497155	2.15470678859689e-06	6.46412036579066e-05	3731	4007	2230	3640	42	169	0	0
mmu-miR-138-5p	602.195623901101	-8.13205829771474	3.64935308980332	4.25554570774175	0.0391223766386189	0.281681111798056	789	905	758	1042	226	0	1	0
mmu-miR-129-2-3p	2067.55725138526	-7.76581710571217	1.55043056977044	45.7883580117263	1.31744185456943e-11	7.90465112741657e-10	5802	4625	722	874	262	179	0	0
mmu-miR-1983	7381.35958568057	-2.48692473024062	2.01663168867317	1.47599553017275	0.224402111321764	0.906416140430509	12080	11921	8864	11239	377	161	1	84
mmu-miR-379-5p	108.307271095008	-2.42237103378402	2.73260673422772	0.805494678683196	0.369455611739045	0.991839832975996	1	0	0	2	475	282	203	137
mmu-miR-101a-3p	105.156565677012	-2.10099599588694	2.72240508496961	0.583308685806543	0.445018336265803	0.991839832975996	82	1	39	87	390	118	184	51
mmu-miR-192-5p	9770.06518235652	-11.3452946214883	2.26369227698461	22.7802101869168	1.81626387378875e-06	6.46412036579066e-05	20510	13267	10976	13775	1058	62	0	0
mmu-miR-3473b	54.6781445501117	-1.65298010895312	3.38968063974194	0.234730006630187	0.628038564874219	0.991839832975996	29	21	39	40	89	124	143	0
mmu-miR-20b-5p	63.0913251843424	-1.39448158982253	3.02156023346467	0.210859128861131	0.646094859454381	0.991839832975996	94	83	41	95	42	41	0	26
mmu-miR-149-5p	2477.20825348202	-1.38439355284588	2.43010212911887	0.321617601952283	0.570637143308321	0.991839832975996	5134	4872	2042	2423	192	272	105	0
mmu-miR-223-3p	1264.9203029305	-1.23300110985464	2.12969509140585	0.337398911523152	0.561334481154197	0.991839832975996	3	0	0	6	3883	2673	3528	3255
mmu-miR-320-3p	5622.9724335483	-1.14119574635499	0.764268976106897	2.21536977396448	0.136642318817389	0.683211594086944	8317	7141	5649	8295	3813	1449	1521	1039
mmu-miR-152-3p	4449.22532509715	-1.11961177251469	0.493057924078231	5.12510431877756	0.0235821531380959	0.22088166715348	6825	6107	5411	7427	693	573	303	372
mmu-miR-28a-3p	11883.6447763331	-1.03106442745745	0.467804656335887	4.83907564102321	0.0278218043013216	0.22763294428354	24161	23356	9397	13580	498	316	132	97
mmu-miR-708-5p	173.961574751838	-0.977826326769778	4.43510330577891	0.0483641989842027	0.825934535403108	0.991839832975996	268	174	217	291	0	106	0	69
mmu-miR-28a-5p	21955.9284892437	-0.965945088343824	0.48381844700223	3.96902672743505	0.0463445521970564	0.320846899825775	40268	40338	19438	29297	1529	1355	723	363
mmu-miR-181d-5p	29123.5893587508	-0.961498636150162	0.3638089236243	6.95582074170595	0.00835469630561245	0.100256355667349	48064	41278	34690	50844	888	653	498	404
mmu-miR-340-5p	90.3000112638609	-0.955298144097242	4.40128885781353	0.0468759682121487	0.828591332493778	0.991839832975996	120	119	107	147	0	53	0	32
mmu-miR-322-3p	2513.88756402798	-0.94444522064485	2.51148866403018	0.140818122857269	0.707469038350969	0.991839832975996	5489	4784	1764	2659	208	261	139	0
mmu-miR-107-3p	16655.5889509127	-0.938317929891725	0.706747897013165	1.75482455102679	0.18527136686934	0.813386488694665	24845	21145	22296	30782	880	1125	462	925
mmu-miR-182-5p	5239.15981557748	-0.904893666775755	2.59948402650743	0.12068714784823	0.728290414031181	0.991839832975996	9739	8241	5284	7809	280	331	315	0
mmu-miR-29b-3p	5826.35447666946	-0.892292214519007	0.571036214608036	2.43411663527129	0.118720757405253	0.617579230106781	13653	8781	5060	6957	497	430	222	108
mmu-miR-1198-5p	1401.06666447669	-0.88654799878116	2.6738805012958	0.109527601000153	0.74068259752162	0.991839832975996	2480	2453	1298	1997	44	175	106	0
mmu-miR-126a-5p	975.904784846917	-0.880789181240276	0.926400651395037	0.900515566910144	0.342643506332962	0.991839832975996	606	451	422	369	1377	3126	977	1204
mmu-miR-195a-5p	78.4209147495153	-0.844024266138751	1.67358718786681	0.253534059208874	0.614597557715794	0.991839832975996	48	24	16	50	106	243	100	115
mmu-miR-744-5p	9724.48855641029	-0.791115874599516	0.614192022009046	1.65417712353087	0.198391354454866	0.850248661949425	13604	14981	11056	16960	1362	759	919	520
mmu-miR-298-5p	20588.5170343042	-0.778497506758235	0.443083531544087	3.07843015276148	0.0793370688791733	0.46066685155649	30320	33034	25019	33647	955	1183	887	512
mmu-miR-148b-3p	3480.81887120983	-0.76574443187149	2.35200702412222	0.105663397518185	0.745136367316178	0.991839832975996	6167	5340	4138	4963	316	127	1	217
mmu-miR-10a-5p	52042.4896012316	-0.662351214975695	0.346907723491899	3.63770569178658	0.0564847223018863	0.376564815345909	78842	71698	62502	96264	2835	2829	2662	1877
mmu-miR-30b-5p	1056.48626664847	-0.656317580297048	3.7791388898195	0.0300981515698595	0.862267711273849	0.991839832975996	2087	1658	1075	1460	109	0	60	0
mmu-miR-22-5p	2323.65247155454	-0.654986320115892	2.51718200918856	0.0675767229533051	0.794898305884937	0.991839832975996	3579	2994	2953	4429	86	54	131	0
mmu-miR-30e-5p	1244.83464083471	-0.638389479850309	2.75186577425083	0.0536823079356594	0.816775359501063	0.991839832975996	2432	2314	1099	1468	159	23	0	66
mmu-miR-29a-3p	13464.070521589	-0.624687617581704	0.401598126612489	2.41621391138564	0.120084850298541	0.617579230106781	27291	24139	11905	16490	717	509	317	210
mmu-miR-1981-5p	2430.31954269631	-0.60717312282063	3.88379432295848	0.0243849759549306	0.875909352397678	0.991839832975996	4484	4458	2283	3141	253	0	0	104
mmu-miR-31-5p	495486.973167753	-0.599730345443591	0.268736109239882	4.9714169716178	0.0257695278345727	0.22088166715348	886411	745224	509092	736135	63406	58092	39491	33483
mmu-miR-222-5p	231.124053911225	-0.598572794697238	4.5337450456968	0.0173943103055194	0.895073282861383	0.991839832975996	361	277	225	334	211	0	0	127
mmu-miR-34a-5p	23279.7730705246	-0.59612491947507	0.596185845974052	0.997781812677061	0.317847840208586	0.991839832975996	36122	31438	31555	41156	434	356	231	414
mmu-miR-674-5p	46542.9222327803	-0.57444642011944	0.687418238100027	0.697258199349761	0.40370651544917	0.991839832975996	72458	75378	53991	76922	1324	512	850	457
mmu-miR-25-5p	498.234309186359	-0.562967699224919	4.05651886542618	0.0192195938375193	0.889738782125182	0.991839832975996	1097	795	460	542	131	0	0	49
mmu-miR-322-5p	36281.501564929	-0.534635200526649	0.526077994185645	1.0312230211332	0.309871588206894	0.991839832975996	76279	68004	28762	40304	2875	2104	758	1138
mmu-miR-127-3p	1570.51445991073	-0.523406809982901	1.42686719701232	0.134435765243197	0.713876502893564	0.991839832975996	117	13	61	55	5714	3305	3832	3119
mmu-miR-146a-5p	245.022588892457	-0.492702314121577	4.33643120098617	0.0128910943153784	0.909603281069483	0.991839832975996	505	382	180	270	0	156	77	0
mmu-let-7d-5p	190646.248783376	-0.482617390896875	0.383880246883562	1.57872612019631	0.208944281044574	0.874650478791239	311991	295178	203488	316420	13711	9696	8562	8292
mmu-miR-106b-5p	51518.0171007525	-0.482048706328323	0.599810750621183	0.645103546986945	0.421868748432077	0.991839832975996	80593	83882	56222	82502	4030	3110	1790	3121
mmu-miR-140-3p	542.909087571087	-0.465692414108267	1.02585226962121	0.205993504100263	0.64992594397922	0.991839832975996	868	983	509	631	159	129	123	36
mmu-miR-365-2-5p	153.06579889155	-0.465155249317032	3.31534957455289	0.0196592267205205	0.888492993073563	0.991839832975996	184	153	33	96	209	349	0	167
mmu-let-7i-5p	114959.289476592	-0.444168094341693	0.403442364715399	1.21088592931048	0.271156736815897	0.961076828813329	185701	179796	126627	192352	5481	3564	3546	3275
mmu-miR-484	1989.7835142244	-0.441843507473881	1.16132043617407	0.144648007124388	0.703703300380454	0.991839832975996	3278	3119	2043	3093	374	100	251	90
mmu-miR-500-3p	2348.25706907546	-0.434457995973671	2.70735708106082	0.0257252212295782	0.872573205631721	0.991839832975996	4625	3360	2627	3202	240	165	289	0
mmu-miR-27a-3p	273393.707437183	-0.432446619062962	0.480884761721593	0.807914215510266	0.36873763289696	0.991839832975996	447002	381673	327450	487261	6743	4900	4051	5757
mmu-miR-425-5p	1794.60626425654	-0.408782095646176	0.684113927237586	0.356902706635211	0.55023144512447	0.991839832975996	3114	2408	2274	2541	260	249	297	118
mmu-miR-27b-3p	166273.826187699	-0.40080362466322	0.374993966278175	1.1415538101582	0.285324238903136	0.972326612766367	280377	279196	177017	258541	3447	2618	2685	1619
mmu-miR-574-3p	203.062899222696	-0.386599574777054	4.64497920347249	0.00691954422977403	0.933705395504998	0.991839832975996	281	322	128	198	0	313	175	0
mmu-miR-125b-1-3p	13141.8186670574	-0.383598095540623	0.699527938743315	0.300455653527251	0.583596907876917	0.991839832975996	25836	19977	14863	17852	254	613	301	273
mmu-miR-196b-5p	54945.6626960868	-0.372239207843821	0.314339597895985	1.4012927861622	0.236507236011848	0.925463097437667	89894	91758	66819	80423	819	1063	758	647
mmu-miR-455-3p	1044.74313730349	-0.370439025893053	3.86969263430672	0.00914905868957305	0.923797987524064	0.991839832975996	2542	2338	548	654	0	171	0	36
mmu-let-7a-5p	300299.542551537	-0.344785526303564	0.390341680080708	0.779735566510112	0.377222025142371	0.991839832975996	438971	452659	339156	524262	31614	21482	24864	22696
mmu-miR-532-5p	4855.48091653026	-0.331396149420256	3.8486294318595	0.00740502893384587	0.931424700656598	0.991839832975996	8324	8629	4932	7000	0	283	0	174
mmu-miR-186-5p	764.747530658635	-0.331381740793387	1.30935796013228	0.0640223160321227	0.800247878347334	0.991839832975996	1118	1167	760	1033	117	391	306	95
mmu-let-7b-5p	294644.872075067	-0.322749319738892	0.236642598302425	1.85919713023236	0.172717491543119	0.777228711944034	465137	405849	381031	510425	10467	9227	11186	8156
mmu-let-7c-5p	298395.479658844	-0.313583911390041	0.350210300605565	0.801378760819262	0.370681462168899	0.991839832975996	429211	433804	362921	552695	12791	9766	13491	9497
mmu-miR-574-5p	16337.59202022	-0.300568633506002	0.722219587530647	0.173107103749118	0.677365061126445	0.991839832975996	25246	23612	20268	26956	1489	942	717	1443
mmu-miR-16-5p	710991.38212803	-0.291806920124838	0.334578290949236	0.760340291249662	0.383222050357522	0.991839832975996	1102370	957862	821273	1248070	87756	68162	77184	73849
mmu-miR-29a-5p	3581.95475012291	-0.29010751378836	3.5517430386404	0.00666235776996871	0.934946298372792	0.991839832975996	7342	5539	4521	4127	0	95	0	58
mmu-let-7g-5p	364059.517698446	-0.289636150249902	0.370158983971836	0.611992064275853	0.43403874715796	0.991839832975996	528052	505658	449191	658762	31642	21680	33773	22240
mmu-miR-501-3p	2098.07581011342	-0.261053658120801	2.8650897977356	0.00829655211413183	0.927424724712524	0.991839832975996	4201	3575	1772	2727	383	0	165	58
mmu-miR-98-5p	29157.5804252888	-0.25958821799081	0.536107175702583	0.234363452692435	0.628307100634544	0.991839832975996	46069	45358	31872	50039	912	1482	1070	1058
mmu-miR-151-5p	31635.4397568706	-0.258901889555013	0.430118903957097	0.362186397333488	0.547294466751786	0.991839832975996	50886	50009	31936	50459	3798	3249	2662	2959
mmu-miR-106b-3p	1658.72892087461	-0.251882846330708	3.96970201841337	0.00402210438129202	0.949432011505738	0.991839832975996	3169	3002	1475	2083	251	0	155	0
mmu-miR-361-5p	5149.38050245435	-0.241122578976309	0.417637107593701	0.333260940066111	0.563745208187631	0.991839832975996	8577	8529	4802	7070	1043	956	831	576
mmu-miR-21a-5p	333732.594867392	-0.240562852718138	0.25257686332308	0.906901339911826	0.340937923394584	0.991839832975996	574098	459572	424996	552573	4951	4730	5631	3750
mmu-miR-26b-5p	64030.0382282841	-0.236199496794781	0.361156160288064	0.427601848741006	0.513168036775049	0.991839832975996	105091	100141	63335	96858	10607	9125	7666	7712
mmu-miR-369-3p	386.460321311733	-0.230836557456987	1.32586482819854	0.0303156795546045	0.861775883124857	0.991839832975996	93	22	48	57	768	1100	1267	592
mmu-miR-423-5p	4510.00184088561	-0.211720245175709	0.575277386462481	0.135418520947212	0.712878785120094	0.991839832975996	4964	4447	3062	4490	5716	4025	5429	2780
mmu-miR-339-5p	112.792483137363	-0.203558415726764	1.21669118211732	0.0279749058824308	0.867167832185772	0.991839832975996	61	101	34	38	268	241	88	135
mmu-miR-652-3p	48349.0086580593	-0.183582120023817	0.463073288588928	0.157139105469923	0.691804248592477	0.991839832975996	86192	74033	47087	73516	6686	3912	4569	3756
mmu-miR-93-5p	216599.794687365	-0.177000335498309	0.25012976759134	0.500661731022092	0.479209507552874	0.991839832975996	371763	355841	235268	323427	9153	8459	7612	6586
mmu-miR-130b-3p	14142.9349635096	-0.176534053353118	0.673351394761408	0.0687265817090577	0.793199978278028	0.991839832975996	15517	14787	21846	31396	988	701	2380	859
mmu-miR-103-3p	409311.98974813	-0.161167171646676	0.266544817903011	0.365555942359748	0.54543668204565	0.991839832975996	667980	589151	481733	691726	21249	18433	21854	17660
mmu-miR-24-3p	576671.130968099	-0.146223739398476	0.245830917409826	0.353762520148621	0.551990947389072	0.991839832975996	888042	775991	752738	1048710	12730	11992	15457	13340
mmu-miR-199b-3p	359.268403652308	-0.143838474034303	1.13774965886544	0.0159824114544875	0.899398234712456	0.991839832975996	102	74	46	95	1238	500	780	705
mmu-miR-23b-3p	132459.181396514	-0.135112556472352	0.322928355855329	0.175039701729219	0.675671161382271	0.991839832975996	230655	221216	129245	199891	8292	7492	7038	5451
mmu-miR-199a-3p	719.4822860692	-0.134425192745287	1.03902813761058	0.0167372171199673	0.897062988064414	0.991839832975996	208	149	93	191	2475	1000	1560	1409
mmu-miR-191-5p	36170.6620353255	-0.133407455336321	0.367194054577776	0.131986152143639	0.716381551844213	0.991839832975996	54034	40992	27954	40540	29229	23897	25623	16650
mmu-miR-130a-3p	283808.52225022	-0.131829194935678	0.422140730652922	0.097516079568635	0.754831046348197	0.991839832975996	535477	448521	290651	426747	5581	5193	5892	2900
mmu-miR-224-5p	30342.8547986314	-0.119070258626015	0.326270203797557	0.133185588295134	0.715151710360562	0.991839832975996	52467	45754	34676	47054	1680	1347	1688	1106
mmu-miR-181c-5p	1079.20712207703	-0.0937861353991024	2.69488509889419	0.00121026915185496	0.972248053585201	0.991839832975996	2286	1521	1196	1373	44	106	128	0
mmu-let-7e-5p	120078.260976284	-0.0806436770267651	0.348854716197869	0.0534340373985458	0.817192029917799	0.991839832975996	188048	198183	130133	198341	3911	3720	3693	3533
mmu-miR-30c-5p	2350.44907707756	-0.0759389753053283	0.839597300341413	0.00818332371090946	0.927920308141279	0.991839832975996	5050	2964	2853	3031	195	154	231	75
mmu-miR-30a-3p	7818.14704285897	-0.068742779132344	1.71632640347734	0.00160339492430239	0.968059311856316	0.991839832975996	13933	12327	8070	11930	790	67	697	83
mmu-miR-26a-5p	97095.5807201174	-0.0680712098892669	0.35391303570186	0.0369924348227073	0.847480450421483	0.991839832975996	152526	155016	98220	149337	15339	11702	13202	11326
mmu-miR-15b-5p	46682.3220458971	-0.0638670800973991	0.457790932686143	0.0194619877324271	0.889050134602297	0.991839832975996	68383	81577	43687	67256	8539	9451	7017	7833
mmu-miR-17-5p	135229.254858522	-0.0575854156730926	0.300593670392023	0.0366986212985694	0.848079950763835	0.991839832975996	217387	241756	138012	190919	12043	10394	10320	8010
mmu-miR-221-3p	57757.3940770321	-0.013912757746998	0.273067683001503	0.00259575644568599	0.959366505128668	0.991839832975996	98813	79190	71908	87744	5908	4320	6237	4653
mmu-let-7f-5p	298602.802202563	-0.00761354719922771	0.378967618053843	0.000403499719141109	0.983973729291623	0.991839832975996	470155	491772	306476	495725	16954	13278	17513	12394
mmu-miR-23a-3p	180729.367983624	-0.00366607610961945	0.323536591675468	0.000128343747405779	0.990961046970415	0.991839832975996	292282	286036	187489	288181	16712	14640	16187	14258
